# Supplementary material
Source: PubMed Central journal article supplement (PMC5793705)
Supplement: jama-318-57-s001.pdf [file jama-318-57-s001.pdf]

1 **ON-LINE SUPPLEMENTAL MATERIAL**

2  
3  
4  
5  
6  
7  
8  
9  
10  
11  
12

**1. Supplement 1: Protocol (line 94)**

**2. Supplement 2: Bayesian Analysis: (line 144)**

13 **Supplemental 1: Protocol**

14 **OPTIMIZING COOLING STRATEGIES AT < 6 HOURS OF AGE FOR NEONATAL**  
15 **HYPOXIC-ISCHEMIC ENCEPHALOPATHY (HIE)**

16  
17

18 **Short Title: Optimizing Cooling for HIE**

19  
20

21 **Seetha Shankaran MD (PI), Abbot Laptook MD, Athina Pappas MD, Abhik Das PhD,**  
22 **Jon Tyson MD, MPH, Richard Ehrenkranz MD, Rosemary Higgins MD, Roy Heyne MD**  
23 **Claudia Pedroza PhD, Rebecca Bara BSN, Kurt Schibler MD, Brenda Poindexter MD,**  
24 **Edward Bell, MD, Scott McDonald BS, Cathy Grisby BSN, CCRC, Carolyn Huitema, MS.**

25

26 **NICHD Neonatal Research Network.**

27  
28  
29

30 **June 30, 2010**

31 Revised September 9, 2010  
32 December 7, 2011  
33 January 9, 2012  
34 February 15, 2013

35  
36  
37  
38  
39  
40  
41  
42  
43  
44  
45  
46  
47  
48  
49  
50  
51  
52  
53  
54

55  
56  
57  
58  
59  
60  
61  
62  
63  
64  
65  
66  
67  
68  
69  
70  
71  
72  
73  
74  
75  
76  
77  
78  
79  
80  
81  
82  
83  
84  
85  
86  
87  
88  
89  
90  
91  
92  
93  
94  
95  
96  
97  
98

## **Optimizing Hypothermia as Neuroprotection at < 6 Hours of Age for Neonatal Hypoxic Ischemic Encephalopathy**

**Objective:** Evaluate whether whole body cooling initiated at < 6 hours of age and continued for a duration of 120 hours or a depth at 32.0°C in infants ≥ 36 weeks gestation with hypoxic ischemic encephalopathy will reduce death and disability at 18 months of age

**Study Design:** A prospective, randomized, 2x2 factorial design multicenter trial. All study infants will receive whole body hypothermia. The intervention will be unmasked. The individual factors tested will be (a) a comparison of two cooling durations (72 versus 120 hours) and (b) a comparison of two different depths of cooling (33.5°C versus 32.0°C)

**Eligibility criteria:** Infants ≥ 36 weeks gestation with a pH (cord or < 1 hour neonatal) ≤ 7.0 or a base deficit ≥ 16 mEq/L **or** an acute perinatal event and either a 10 minute Apgar score ≤ 5 or ventilation initiated at birth and continued for 10 minutes. All infants must have signs of moderate or severe encephalopathy at ≤ 6 hours of age at the time of enrollment.

**Study Intervention:** Infants will be randomized to either usual depth of cooling (33.5°C) or deeper cooling (32.0°C) and then to usual length of cooling (72 hours) or longer cooling (120 hours). Hypothermia will be achieved with whole body cooling using the Cincinnati Sub-Zero Hyper/Hypothermia Device. Safety measures will be monitored and adverse events will be compared between groups using sequential analyses methods. The first interim analysis for safety will occur after the first 40 infants are accrued into the study (10 in each arm of the factorial design). The study will proceed after DSMC review.

**Primary outcome:** The primary outcome will be death or moderate/severe disability at 18-22 months of age.

**Sample size estimates:** Estimated event rates are 37.5% for usual duration vs. 27.5% for longer duration or 37.5% for usual depth of cooling vs. 27.5% for deeper cooling. With a two-tailed, type 1 error of 5%, power set at 80%, with 5% lost to follow-up, 363 infants per group (longer cooling, deeper cooling) or a total of 726 subjects will be enrolled. A Bayesian analysis will be used for examining the results if the treatment effect is smaller than hypothesized.

**Duration of study:** Based on the current NICHD Neonatal Research Network Centers survey of infants receiving whole body cooling at < 6 hours of age as part of usual care, 5 years will be adequate for enrollment and an additional 1.5 years for follow-up.

## 1.0 STATEMENT OF THE PROBLEM

The NICHD Workshop on Hypothermia and Perinatal Asphyxia (Higgins 06) and the Committee of the Fetus and Newborn of the American Academy of Pediatrics (Blackmon 06) have recommended that therapeutic hypothermia, if offered, should be used only under published protocols (Shankaran 05, Gluckman 05). Although it is postulated that deeper, longer and earlier therapy with hypothermia is preferred, the optimal degree and duration of cooling is unknown (Gunn 98, Higgins 06 and Barks 08). It is also unclear whether the degree and duration of therapy should be based on the cause, severity, and stage of brain injury (Higgins 06). Since these statements by NICHD and COFN were published, several meta-analyses evaluating the safety and efficacy of hypothermia in term infants with encephalopathy have become available; all the published meta-analyses have concluded that in term infants < 6 hours of age with moderate or severe encephalopathy, hypothermia to 33.5 to 35.0°C for 72 hours decreases mortality and disability at 18 months of age (Azzopardi and Edwards 07, Shah 07, Jacobs 07 and Schulzke 07).

Currently the NICHD NRN sites are offering cooling to term infants (defined as  $\geq 36$  weeks gestation) who are < 6 hours of age with encephalopathy presumably due to hypoxia-ischemia (HIE). We now have the opportunity to examine whether greater depth of cooling or longer duration of cooling could safely offer more neuroprotection than the depth and duration of cooling currently offered as usual care in the NRN sites. No other neuroprotective approach with pharmacological therapy (antioxidant, anti-inflammatory and immunomodulatory, growth factors, erythropoietin or stem cells) is ready for clinical use (Gressens 07).

We propose to evaluate both deeper cooling and longer cooling in a randomized trial using a 2 by 2 factorial design. Given the sample size challenges for evaluating two modifications of cooling therapies, we propose this factorial design which will be testing two approaches to optimize cooling within one trial. The NICHD NRN is the only multi-center network positioned to perform this trial with efficiency. Our hypothesis is: Whole body cooling initiated within 6 hours of age can be optimized to further decrease the outcome of death and disability at 18 months of age, by a greater depth of cooling or a longer duration of cooling among infants with moderate and severe encephalopathy.

## 2.0 BACKGROUND AND SIGNIFICANCE

The NICHD trial of whole body cooling for 72 hours at 33.5°C demonstrated that death or moderate or severe disability occurred in 45 of 102 (44%) in the hypothermia group and 64 of 103 (62%) in the control group, risk ratio (95% confidence interval) RR (95%CI) 0.72 (0.54-0.95), P=0.01 (Shankaran 05). Three infants had moderate disabilities; 2 hypothermia and 1 control group infant (Shankaran 08). Among infants with moderate encephalopathy at randomization, the rate of death or disability was reduced from 30/63 (48%) in the control group to 22/69 (32%) in the hypothermia group,

144 RR 0.69 (0.44-1.07), P = 0.09. Among infants with severe encephalopathy at  
 145 randomization, the rate was reduced from 34/40 (85%) to 23/32 (72%), RR 0.85 (0.64-  
 146 1.13), P = 0.24. In the Cool Cap trial, using both clinical and aEEG entry criteria for  
 147 enrollment with cooling at 34 to 35°C for 72 hours, death or severe disability occurred in  
 148 73 of 110 (66%) of conventional care and 59 of 108 (55%) assigned to head cooling, OR  
 149 0.61 (0.34 to 1.09), P=0.10. After adjustment for severity of aEEG changes, OR for  
 150 hypothermia was 0.57 (0.32 to 1.01), P=0.05 (Gluckman 05). Recently, the Cool Cap  
 151 study investigators published data on outcome based on severity of encephalopathy at  
 152 randomization (Wyatt 07). Among infants with moderate encephalopathy at enrollment,  
 153 death or disability at 18 months was 39/69 (57%) in controls and 28/62 (45%) in the  
 154 cooled group. Among infants with severe encephalopathy at enrollment, the control  
 155 group rate of death or disability was 32/35 (91%) and in the cooled group it was 28/40  
 156 (70%). In both trials, approximately 66% of neonates had moderate encephalopathy at  
 157 randomization. Table 1 summarizes primary outcome data by severity of encephalopathy  
 158 from the two large trials.

159  
 160  
 161 **Table 1: Proportion of Infants with Moderate and Severe Encephalopathy with**  
 162 **Primary Outcome of Death and Disability in the NICHD and Cool Cap Trials**  
 163

164  
 165

|                                                      | <u>Cooled</u><br>Death/disability | <u>Control</u><br>Death/disability |
|------------------------------------------------------|-----------------------------------|------------------------------------|
| <u>MODERATE HIE</u>                                  |                                   |                                    |
| Whole body Hypothermia<br>NICHD trial (Shankaran 05) | 32%                               | 48%                                |
| Cool Cap trial (Wyatt 07)                            | 45%                               | 57%                                |
| <u>SEVERE HIE</u>                                    |                                   |                                    |
| Whole body Hypothermia<br>NICHD trial (Shankaran 05) | 72%                               | 85%                                |
| Cool Cap trial (Wyatt 07)                            | 70%                               | 91%                                |

166  
 167  
 168 *In summary, cooling for 72 hours at a core temperature of  $\geq 33.5^{\circ}\text{C}$  resulted in a death*  
 169 *or disability rate of 32 to 45% with moderate HIE and 70 to 72% with severe HIE.*  
 170 *Therefore the rate of death or disability continues to be high.*

171  
 172 The NICHD trial, the Cool Cap trial, the TOBY trial and other ongoing trials (ICE trial,  
 173 European trial) have used a target temperature  $\geq 33.5^{\circ}\text{C}$  for 72 hours. Debate is now

174 occurring whether: a) cooling initiated earlier than the current RCT will be more  
175 beneficial, b) infants with moderate HIE should be treated differently than those with  
176 severe HIE, c) a greater depth of cooling may be more beneficial and d) a longer duration  
177 of cooling may offer greater neuroprotection?  
178

179 **2.1 Initiation of cooling earlier than published trials:** Animal data supports the concept  
180 that earlier initiation of therapeutic hypothermia is associated with greater  
181 neuroprotection compared to later initiation (Gunn 97, 98). However in clinical practice,  
182 four to five hours of age appears to be the earliest time period for cooling to be initiated  
183 after the following procedures occur: screening, stabilization, evaluation and diagnosis of  
184 encephalopathy, consent and randomization. (Gluckman 05, Shankaran 05). Furthermore,  
185 the neurological examination often changes during the early hours following birth and  
186 initiation of therapeutic hypothermia at < 2 hours may lead to treatment of infants who  
187 would not merit the intervention at 4-6 hours.  
188

189 **2.2 Should infants with moderate HIE be treated differently than infants with severe**  
190 **HIE?** Performing an RCT with different cooling regimens for moderate and severe HIE  
191 may be prohibitive regarding sample size requirements. *In the NICHD trial, infants with*  
192 *moderate and severe HIE had the same direction of benefit with cooling (Shankaran 08).*  
193 *We speculate, therefore, that a greater depth and duration of cooling for both moderate*  
194 *and severe HIE may further improve outcome.*  
195

196 **2.3 Greater depth or longer duration of cooling:** At the present time, the optimum  
197 depth or duration of cooling for neonatal encephalopathy is unknown. Infants with severe  
198 HIE may have brain injury before birth and be in secondary energy failure or may rapidly  
199 progress into secondary energy failure (Rutherford 06, Westgate 99). Therefore there  
200 may be a reduction in the benefit of hypothermia as currently applied (Gunn and  
201 Thoresen 06). It has been noted in studies performed prior to the introduction of  
202 hypothermia that term infants with severe HIE do not show any recovery of cerebral  
203 oxidative metabolism (Azzopardi 89) and childhood or school age outcome is associated  
204 with higher rates of death and disability among infants with severe as compared to  
205 moderate encephalopathy (Robertson 89, Shankaran 91). The NIH Neurology Group on  
206 HIE has suggested that treatment for moderate encephalopathy should start with modest  
207 hypothermia, while treatment for severe encephalopathy could include deeper  
208 hypothermia, more prolonged cooling, or modest hypothermia plus other strategies  
209 (Perlman 06). Therefore, cooling of 5°C to a depth of 32°C may be better than cooling of  
210 3°C to 34°C; more cooling might show greater cerebral protection (Gunn and Thoresen  
211 06). Longer cooling may protect against the continued cascade of injury, especially  
212 apoptosis and inflammation that has been shown in the animal model to extend over  
213 several days (Lorek 94, Bennet 06, and Gunn 97). Figure 1 shows the phases of cerebral  
214 injury after a severe but reversible period of hypoxia-ischemia (Gunn and Gluckman 07).

215  
216  
217  
218  
219  
220  
221

**Figure 1: Phases of Cerebral Injury**

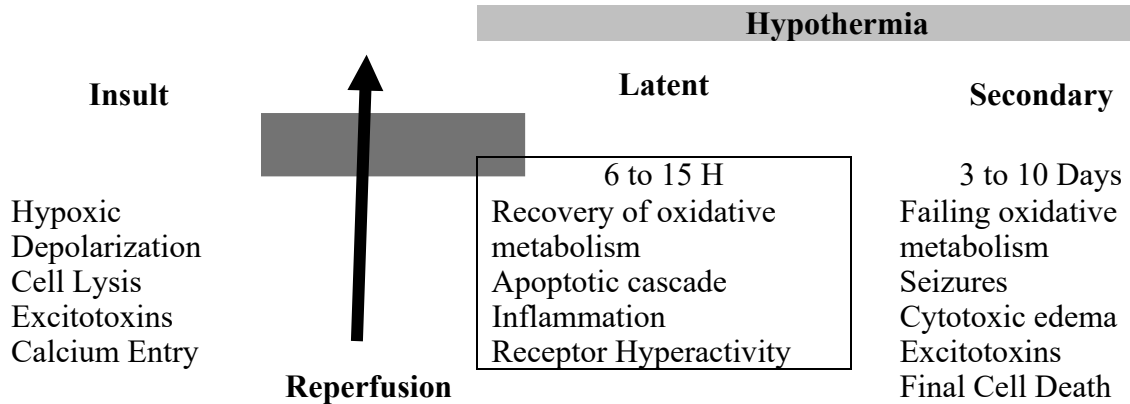

222  
223

224 During **reperfusion** after the insult, there is a period of approximately 30 to 60 minutes  
225 during which cellular energy metabolism is restored, with progressive resolution of the  
226 acute cell swelling secondary to hypoxic-depolarization. This is followed by a **latent**  
227 phase, during which oxidative metabolism has normalized (Thoresen 95), but there is  
228 hyperactivity of glutaminergic receptors, the intracytoplasmic components of the  
229 apoptotic pathway are activated and secondary inflammatory reaction is initiated. This  
230 may be followed by **secondary** deterioration leading to delayed neuronal death after 3  
231 days. As indicated in the figure, treatment with cerebral hypothermia needs to be initiated  
232 as early as clinically feasible in the latent phase before the onset of secondary  
233 deterioration, and then continued for long lasting neuroprotection. The duration of the  
234 therapeutic time window depends on the severity of cerebral hypoxia-ischemia under  
235 normothermia and delayed hypothermia in newborn piglets (Iwata 07).

236

237 **2.4 Cooling to a depth of 4 to 6°C vs. control in the animal model of hypoxia-**  
238 **ischemia:** The detrimental effects of 24 to 48 hours of cooling to a depth of 8°C (37 to  
239 29°C) in the primate stroke model (Michenfelder 77), cats and monkeys (Steen 79) and  
240 dogs (Steen 80) have been reported. There is however, established evidence in fetal and  
241 neonatal models, and across species, that cooling by 4-6°C vs. controls has been  
242 neuroprotective while being well tolerated in animal models (Bona 98, Busto 87, Carroll  
243 92, Colbourne 94, Gunn 97, Gunn 98, Haaland 97, O'Brien 06, Sirimanne 96, Thoresen  
244 96, Thoresen 01, Tooley 02, Tooley 03, Tooley 05, Yager 96). The duration of cooling in  
245 these studies varied from 3 to 72 hours, and each study compared a specific depth of  
246 cooling to controls. The depth of cooling achieved in each of these studies was a rectal  
247 temperature of 28°C (Carroll 92), 32°C (Bona 98), 32.5°C (Thoresen 96) or 33°C  
248 (O'Brien 06). Scalp temperatures achieved in other studies were 21.0-23.9°C (Tooley  
249 03). Extradural brain temperatures in studies by Gunn are reported as low as 30°C (Gunn  
250 98, 99). Actual brain temperature studies document temperatures of 30-32.2°C (Tooley

251 02), 31.1°C (Tooley 05) and 32°C (Colbourne 94). None of these studies comparing a  
252 specific depth of hypothermia to controls report any adverse effects except one report of a  
253 piglet shivering during the cooling (Tooley 05). There are no studies where a temperature  
254 of 32.0°C has been maintained for longer than 72 hours.

255  
256  
257 **2.5 Temperature-specific neuroprotective pattern of hypothermia:** The  
258 neuroprotective pattern of therapy with hypothermia is temperature specific. There is  
259 suggestive data that optimal neuroprotection appears to occur at different temperatures in  
260 the cortical and deep gray matter. Neuroprotection with hypothermia by 4 to 6°C has  
261 been documented by many modalities, including a decrease in brain energy utilization  
262 measured by magnet resonance spectroscopy (Laptook 95), reduction of infarct size  
263 (Taylor 02), decrease in neuronal cell loss (Gunn 98), retention of sensory motor function  
264 (Bona 98), preservation of hippocampal structure (Carroll 92, Colbourne 94) and  
265 recovery of electroencephalographic activity (Gunn 98). Hypothermia initiated  
266 immediately post reperfusion was protective, with progressively increased protection  
267 with increasing depth of temperature, noted in studies that compared different depths of  
268 hypothermia vs. control. Hypothermia ranging from 34 to 31°C compared to 37°C has  
269 been found to preserve cerebral energy metabolism and suppress oxidative metabolism  
270 (Williams 97). Multiple other processes are involved in neuroprotection with  
271 hypothermia including decreasing apoptosis, limiting free radical injury, suppression of  
272 the inflammatory response, and a decrease in the inhibition of protein synthesis (Gunn  
273 and Thoresen 06). There is a significant correlation of both phospho creatinine/inorganic  
274 phosphorus and ATP levels with brain swelling. Tissue swelling was minimized at 31°C  
275 as compared to higher temperatures. Thoresen has also noted that seven day old rats  
276 treated with hypothermia to a temperature of 32.5°C had significantly less damage based  
277 on histological sections of the brain than normal control animals maintained at 38.3°C  
278 (Thoresen 95). Although intras ischemic variations of brain temperature had no significant  
279 influence on energy metabolite levels measured at the conclusion of ischemia in the rat  
280 model, the histopathological consequences were markedly influenced, however, with  
281 preservation of cell counts at 31 and 34°C (Busto 87). The mechanisms of  
282 neuroprotection at a greater depth (32-33°C) of hypothermia may or may not be different  
283 from those known to be neuroprotective at 33-34°C.

284  
285 **2.6 Safety of cooling to < 33.0°C in the clinical setting:** The pilot trial by Eicher and  
286 colleagues was performed with whole body cooling to a temperature of 33°C for 48 hours  
287 (Eicher 05). This is a lower temperature and shorter duration than that used in the NICHD  
288 or the Cool Cap trial (Shankaran 05, Gluckman 05). The average temperature in this pilot  
289 RCT was 32.8 ± 1.4°C at two hours of age. In this trial, 77% of the neonates had severe  
290 encephalopathy at randomization (unlike the NICHD and Cool Cap trial where 33% of  
291 infants had severe encephalopathy). Death or severe motor scores were significantly  
292 lower at 12 months of age in 52% of cooled infants compared to 84% of control infants  
293 (Eicher 05). The safety concerns of a target temperature of 33°C raised by Eicher  
294 included a higher incidence of bradycardia and a greater use of inotropic agents during  
295 cooling in the hypothermia group as compared to the control group. A longer use of  
296 pressor medication, longer prothrombin times and lower platelet counts were noted in the



297 hypothermia group as compared to infants in the control group. In addition, clinical  
298 seizures after enrollment were noted more commonly among the infants that underwent  
299 cooling as compared to the control infants.

300

301 In the NICHD Neonatal Research Network randomized controlled trial, hypothermia to a  
302 target esophageal temperature of 33.5°C for 72 hours was achieved using the Blanketrol  
303 II Hyper-Hypothermia Cincinnati Sub-Zero cooling system. On the servo mechanism, an  
304 expected overshoot occurs with initiation of cooling. This is followed by establishment of  
305 an equilibration near the target set point within 0.1°C (Shankaran 05). While evaluating  
306 safety outcomes of this trial (Shankaran 08), we noted unexplained intermittent drops of  
307 temperature remote from the initial overshoot. We found that the maximum overshoot  
308 below the target temperature was minus  $1.4 \pm 0.6^\circ\text{C}$  (range was 0.0 to 4.1°C). The  
309 duration of time spent below the target of 33.5°C was 1.25 to 75.5 hours among all  
310 infants; one infant never achieved target temperature. There were 40 temperatures  
311 recorded  $< 32.0^\circ\text{C}$  after the initial overshoot among infants in the hypothermia group.  
312 There were 17 infants with temperatures  $< 32.0^\circ\text{C}$  after the initial overshoot and 10  
313 infants who had temperatures  $< 32.0^\circ\text{C}$  after equilibration. In spite of these decreases in  
314 temperature to  $< 32.0^\circ\text{C}$ , no adverse events were temporally related during the 72 hour  
315 intervention period between infants with these temperature decreases and those who did  
316 not have the temperature decreases. Among infants who were cooled, there were no  
317 significant differences in esophageal temperatures among infants who received  
318 anticonvulsants and those who did not receive these medications. Similarly, there were no  
319 significant differences in esophageal temperatures among infants who received sedatives  
320 or analgesics and those who did not receive these medications. The use of inotropic  
321 agents to support blood pressure during study intervention was comparable among all the  
322 infants in the hypothermia and control groups. The two groups were also comparable in  
323 the number of infants receiving volume expanders, blood transfusions and platelet  
324 transfusions during the study intervention period. The number of infants with clinical  
325 seizures at baseline, 48 and 72 hours of study intervention were similar in the  
326 hypothermia group as compared to the control group. At 24 hours of study intervention,  
327 fewer infants in the hypothermia group had seizures as compared to the control group  
328 (Shankaran 08).

329

330 The first study evaluating safety of whole body hypothermia to a depth of 30 to 33°C in a  
331 small group of term infants with HIE was recently published (Compagnoni 08). Three  
332 groups of infants were studied; the control group (n=11) was treated with routine  
333 standard methods. A second group of infants (n=10, categorized as mild hypothermia)  
334 was treated with cooling to a temperature of 32 to 34°C and a third group (n=18,  
335 categorized as deep hypothermia) was treated with target temperature maintained at 30 to  
336 33°C for 72 hours. Cerebral magnetic resonance imaging was performed after the second  
337 week of life and neurological examinations recorded in all survivors at 12 months of age.  
338 During the study intervention of cooling for 72 hours, disseminated intravascular  
339 coagulation was noted in two cases in the control group, pulmonary hypertension in two  
340 infants in the group with mild hypothermia and pneumonia was noted in three infants in  
341 the group with deep hypothermia. There were 5 deaths; two in the control, 1 in the mild  
342 and 2 in the deep hypothermia group, respectively.

343

344 **2.7 Efficacy of cooling to 30.0 to 33.0°C in neonates:** In the study of Compagnoni et al,  
345 severe cerebral lesions on magnetic resonance imaging and poor neurologic outcome was  
346 observed in four of nine cases in the control group (44.5%) compared to one of nine cases  
347 in the mild hypothermia group (11.2%) and one of 16 cases (6.3%) in the group with  
348 deep hypothermia, (control vs. mild or deep hypothermia groups  $P < 0.05$ ) (Compagnoni  
349 08). This study was not adequately powered to evaluate efficacy of cooling to 30.0 to  
350 33.0°C.

351

352 **2.8 Justification for a longer duration of cooling:** Cooling of the brain for a few hours  
353 can be modestly protective, but is exquisitely dependent on the timing at the end of  
354 hypoxia-ischemia (Gunn and Thoresen 06). Neuroprotection with cooling that was  
355 initiated within 6 hours has required relatively prolonged periods of cooling, typically  
356 longer than 12 hours. Cooling was continued for three days in the fetal sheep studies  
357 because pilot studies demonstrated intense rebound of seizure activity and increased cell  
358 loss if cooling was stopped after less than 24 to 48 hours. In contrast, spontaneous re-  
359 warming after three days of cooling was associated with only minor transient  
360 epileptiform activity (Gunn 06). Since rebound seizure activity after re-warming from 72  
361 hours of cooling has been reported in animal models (fetal sheep, Gerrits 05 and newborn  
362 piglets, Iwata 05), it is possible that cooling for four or five days may provide further  
363 benefit. Rebound seizure activity during re-warming after a cooling period of 72 hours  
364 has been noted in clinical practice in human neonates (Battin 04); seizure activity during  
365 rewarming was not seen in either of the 2 large RCT (Gluckman 05, Shankaran 05).

366

367 The need for prolonged cooling is also justified based on experimental evidence that  
368 biphasic edema after hypoxic ischemic brain injury in the neonatal rat reflects early  
369 neuronal damage and late glial injury (Nedelcu 99). Brain injury is an evolving process  
370 with necrosis (predominant cell death during the acute phase) and apoptosis (predominant  
371 cell death with less severe insults) occurring over days and months (Robertson 07). In the  
372 human neonate, despite adequate oxygenation and circulation following resuscitation for  
373 HIE, phosphocreatine (PCr) and nucleotide triphosphate (NTP mainly ATP) decreased  
374 and inorganic phosphate (Pi) increased (Azzopardi 89). These findings, along with  
375 increased brain lactate levels (Robertson 99) and an alkaline intracellular pH (Robertson  
376 02) in the first few *days* after birth were associated with neurodevelopmental impairment  
377 and increasing mortality. These changes have been termed secondary energy failure on  
378 the basis that cerebral metabolism recovered on resuscitation but deteriorated again  
379 following a variable period (the latent phase). Adverse biological processes contributing  
380 to secondary energy failure after intrapartum hypoxia-ischemia include the inflammatory  
381 cascade, accumulation of excitatory neurotransmitters, intracellular calcium  
382 accumulation, and generation of oxygen free radicals, mitochondrial dysfunction and  
383 increased apoptosis (Northington 01, Taylor 99, Johnston 01, Orrenius 03, and Brown  
384 03). *The inflammatory changes and histological changes following acute perinatal*  
385 *asphyxia can occur for a prolonged period of time, from 3 to 10 days in pre-clinical*  
386 *models (Figure 1). This is additional justification for prolonging the duration of cooling,*  
387 *while the latent phase and secondary injury continues to be recognized as occurring*  
388 *remote from the primary insult.* In the proposed study we have selected the duration of

389 120 hours which will be 48 hours longer than the current duration of clinical cooling of  
390 72 hours. We wish to examine a duration that is both longer than and as safe as current  
391 practice.

392  
393 **2.9 Justification for deeper cooling:** Covey noted hypothermia of 5°C administered post  
394 insult for 6 hours in 7 day old rat pups offered better neuroprotection for striatal neurons  
395 than 2°C (Covey 07). Iwata and colleagues have demonstrated that cooling at 2 different  
396 regimens (rectal temperatures of 35 and 33°C compared to normothermia of 38.5 to  
397 39.0°C) for 48 hours in newborn piglets demonstrated progressive increase in neuronal  
398 viability in gray matter (Iwata 05). Laptook has demonstrated a linear relationship  
399 between brain energy utilization rate and brain temperature over the range of  
400 temperatures between 27.6 to 41°C, with a 1°C reduction in brain temperature leading to  
401 a 5.3% reduction in brain energy utilization rate in 8-9 and 15-16 day piglets (Laptook  
402 95). Taylor looked at infarct size in 14 day old rats with cooling to 33.0 and 30.0°C  
403 compared to normothermia, and found smaller infarct size at both depths compared to  
404 normothermia (Taylor 02). Williams has evaluated cerebral energy metabolism during  
405 hypoxia-ischemia, and demonstrated that when compared to controls, NMR metabolites  
406 were preserved at 31.0 and 34.0°C in 7 day postnatal rats (Williams 97). None of these  
407 studies comparing differing depths of temperature to controls documents adverse effects.  
408 In addition, adjusting brain temperatures from 28.0°C and 41.0°C did not alter any  
409 systemic variable in the piglet model except for heart rate, which directly correlated with  
410 brain temperature (Laptook 95). In the proposed study we have selected a depth of  
411 32.0°C which will be 1.5°C lower than the current depth of clinical cooling of 33.5°C  
412 since we wish to examine a depth that is greater than and as safe as current practice.

413  
414 **2.10 Hyperthermia in infants with hypoxic ischemic encephalopathy:** The NICHD  
415 trial of whole body hypothermia demonstrated occurrence of **elevated core body**  
416 **temperature** in the control group infants when temperatures were measured in a  
417 consistent manner in the 76 hours of study intervention and re-warming phase (Shankaran  
418 05). Of the 102 infants randomized to the usual care group, 50 infants had a maximum  
419 esophageal temperature  $\geq 38.0^\circ\text{C}$ . Higher core temperatures were associated with  
420 significant increases in risk of death or impairment in the control group (Laptook 08). In  
421 a secondary analysis of the Cool Cap trial, investigators also noted an association  
422 between elevated temperatures in the control group and increased risk of death or  
423 disability (Wyatt 07). Hyperthermia after brain injury adds to the risk of more severe  
424 neurologic damage and studies in adults and pediatric subjects consistently support  
425 association between higher core temperatures and worse outcome (Dietrich 07, Bramlett  
426 07). In the animal model, seizures associated with a hypoxic ischemic insult result in  
427 aggravation of neuronal cell death, specifically within the hippocampus (Yager 04). The  
428 damage to the hippocampus occurs in the setting of spontaneously occurring  
429 hyperthermia of 1.5°C; rat pups in whom hyperthermia was prevented during seizures  
430 displayed significant reduction in brain damage compared to controls. In another study,  
431 neonatal rats subjected to hypoxic ischemic injury were noted to have selective and long  
432 lasting learning and memory impairments during behavioral tasks, and hypothermia to  
433 27.0°C significantly reduced the attentional deficit in behavioral tasks, whereas  
434 hyperthermia aggravated the behavioral deficit and the brain injury (Mishima 04). *These*

435 *studies indicate that preventing spontaneous hyperthermia in the model of hypoxic*  
 436 *ischemic seizures in the newborn is neuro-protective. Therefore, it is imperative that*  
 437 *breakthrough hyperthermia should be prevented in neonates after the cooling period to*  
 438 *optimize neuroprotection.*

439  
 440  
 441  
 442  
 443  
 444  
 445  
 446  
 447  
 448  
 449  
 450  
 451  
 452  
 453  
 454  
 455  
 456  
 457  
 458  
 459  
 460

**3.0 PRELIMINARY DATA ANALYSIS OF DEEPER COOLING**

**3.1 Preliminary data analysis performed for this protocol:** Preliminary analysis of data from the randomized control trial (Shankaran 05) was carried out in an attempt to optimize cooling strategies for the current protocol. Neonates being cooled on the servo controlled mechanism of the Blanketrol Hyper-Hypothermia cooling system do drop their core esophageal temperature initially below target temperature (overshoot of temperature) for varying periods of time before they reach equilibrium defined as within 0.1-0.2 of target (Shankaran 08). We examined details of recorded temperatures of all cooled infants and performed three analyses of the whole body hypothermia trial.

- 1) The first analysis was to evaluate whether there was an association between time spent below target temperature (< 33.5°C) and primary outcome. As noted in Table 2 below, there was no significant association between times spent below 33.5°C and primary outcome, or components of the primary outcome, among infants in the hypothermia group; however there is a trend for a lower frequency of primary outcome with greater time spent < 33.5°C. One explanation for lack of a significant association could be that time spent below 33.5°C in this study was not adequate enough, hence there is a need to examine whether deeper and longer cooling is neuroprotective.

**Table 2:** Hypothermia infants – Hours spent with esophageal temperature < 33.5

|                                 | N    | Mean  | SD    | Q1    | Median | Q3    | p-value† |
|---------------------------------|------|-------|-------|-------|--------|-------|----------|
| All infants                     | 101* | 48.72 | 18.71 | 36    | 52     | 63.25 | -        |
| Death or mod-severe disability  | 44   | 45.44 | 21.27 | 31.25 | 48.25  | 60.5  | 0.22     |
| Infants without primary outcome | 57   | 51.25 | 16.21 | 39.75 | 52.25  | 65    |          |
| Death                           | 23   | 42.26 | 23.78 | 15.25 | 45.75  | 59    | 0.18     |
| Survival                        | 78   | 50.62 | 16.64 | 37.5  | 52.875 | 64.5  |          |
| <b>Among survivors</b>          |      |       |       |       |        |       |          |
| Mod-severe disability           | 21   | 48.92 | 18.06 | 33.5  | 54     | 61    | 0.54     |
| No mod-severe disability        | 57   | 51.25 | 16.21 | 39.75 | 52.25  | 65    |          |

\*One infant had missing esophageal temperatures. Q represents quartiles. N = number of infants. Mean and Median is time in hours.

† P-values are from Wilcoxon Two-Sample Test, t approximation.

2. A second analysis was performed to understand why some infants in the hypothermia group had excessive decreases in temperature (either following the initial overshoot or after achieving equilibration) because this information may enable us to target specific approaches among those infants who we have predicted would tolerate deeper temperatures less well. We compared the perinatal characteristics (age of randomization, 10 minute Apgar score, cord pH, and base deficit) and neonatal characteristics (birth weight, seizures at randomization, level of encephalopathy and inotropic support at randomization) between infants who had no temperatures recorded below 32°C after the initial overshoot compared to those infants who had a temperature of less than 32°C after the initial over shoot and those who had a temperature of < 32°C after achieving equilibration. As noted in Table 3, there were no significant differences between the infants who did not have an overshoot below 32°C and those who dropped their temperatures < 32°C after the overshoot or after equilibration. *There is however a trend for a greater need for inotropic support at randomization between those infants who dropped their temperature below 32°C after initial overshoot (7/17 or 41%) and those who dropped their temperatures after equilibration (6/10 or 60%) compared to those who had no drops below 32°C (20/74 or 27%).*

**Table 3:** Hypothermia infants—comparison of infants with esophageal temperatures < 32°C after initial overshoot or equilibration.

|                                    | No drops below 32°C after initial overshoot (N=74) |     | Esop. temp. < 32°C after initial overshoot (N=17) |     | Esop. temp. < 32°C after equilibration (N=10) |     | p-value (Fisher's Exact Test) |
|------------------------------------|----------------------------------------------------|-----|---------------------------------------------------|-----|-----------------------------------------------|-----|-------------------------------|
|                                    | N                                                  | %   | N                                                 | %   | N                                             | %   |                               |
| Outborn                            | 34                                                 | 46% | 9                                                 | 53% | 4                                             | 40% | 0.85                          |
| Male gender                        | 36                                                 | 49% | 12                                                | 71% | 3                                             | 30% | 0.11                          |
| 10 minute apgar ≤ 5 *              | 59                                                 | 86% | 11                                                | 73% | 9                                             | 90% | 0.52                          |
| Seizures at randomization          | 30                                                 | 41% | 10                                                | 59% | 4                                             | 40% | 0.38                          |
| Severe level of initial HIE †      | 22                                                 | 30% | 6                                                 | 35% | 3                                             | 30% | 0.94                          |
| Moderate level of initial HIE      | 51                                                 | 70% | 11                                                | 65% | 7                                             | 70% |                               |
| Inotropic support at randomization | 20                                                 | 27% | 7                                                 | 41% | 6                                             | 60% | 0.08                          |

\* 7 infants are missing this data, N=94. Five are in the first group (N=69), and two are in the middle group (N=15). † 1 infant is missing initial HIE in the first group (N=73).

490  
 491  
 492  
 493  
 494  
 495  
 496  
 497  
 498  
 499

3. Lastly, variables were examined between infants who had no decreases in esophageal temperature below 32°C with those who had decreases after either overshoot or after equilibration (Table 4). *As noted, infants with a lower birth weight (when weight is evaluated as a continuous measure) had more frequent decreases in temperature below 32°C.*

**Table 4:** Hypothermia infants: Comparison of infant with esophageal temperatures < 32°C after initial overshoot or equilibration.

| <b>Age at randomization</b> | N  | Mean | SD   | Min  | Q1   | Median | Q3   | Max  | p-value |
|-----------------------------|----|------|------|------|------|--------|------|------|---------|
| No < 32°C after overshoot   | 74 | 4.29 | 1.27 | 0.77 | 3.5  | 4.48   | 5.1  | 7.33 | 0.87    |
| < 32°C after overshoot      | 17 | 4.27 | 1.34 | 2.08 | 3.5  | 4.25   | 5.53 | 6.42 |         |
| < 32°C after equilibration  | 10 | 4.06 | 1.26 | 2.2  | 3.25 | 3.92   | 5.23 | 5.58 |         |

500

| <b>Birth weight</b>        | N  | Mean   | SD    | Min  | Q1   | Median | Q3   | Max  | p-value |
|----------------------------|----|--------|-------|------|------|--------|------|------|---------|
| No < 32°C after overshoot  | 74 | 3475.9 | 642.8 | 2050 | 3020 | 3322   | 3860 | 5432 | 0.04    |
| < 32°C after overshoot     | 17 | 3153.8 | 484.8 | 2570 | 2761 | 3100   | 3461 | 4110 |         |
| < 32°C after equilibration | 10 | 3108.6 | 499.9 | 2430 | 2755 | 2960.5 | 3510 | 3960 |         |

501

| <b>Cord pH</b>             | N  | Mean | SD   | Min  | Q1   | Median | Q3   | Max  | p-value |
|----------------------------|----|------|------|------|------|--------|------|------|---------|
| No < 32°C after overshoot  | 54 | 6.87 | 0.20 | 6.55 | 6.71 | 6.89   | 6.99 | 7.27 | 1.0     |
| < 32°C after overshoot     | 10 | 6.84 | 0.17 | 6.47 | 6.78 | 6.89   | 6.98 | 7.02 |         |
| < 32°C after equilibration | 8  | 6.87 | 0.15 | 6.69 | 6.78 | 6.88   | 6.91 | 7.19 |         |

502

| <b>Cord base deficit</b>   | N  | Mean  | SD   | Min | Q1 | Median | Q3 | Max | p-value |
|----------------------------|----|-------|------|-----|----|--------|----|-----|---------|
| No < 32°C after overshoot  | 45 | 18.38 | 7.36 | 3   | 14 | 18     | 23 | 34  | 0.95    |
| < 32°C after overshoot     | 9  | 18.33 | 4.5  | 10  | 16 | 20     | 21 | 24  |         |
| < 32°C after equilibration | 8  | 19.25 | 4.80 | 12  | 16 | 18.5   | 24 | 25  |         |

503 \* P-values are from Kruskal-Wallis Test (one-way ANOVA). Variables tested are  
504 continuous measures

505

506 *Therefore, in the current protocol it will be necessary to identify those infants at higher*  
507 *risk for temperature decreases below target (infants requiring blood pressure support*  
508 *and those <25<sup>th</sup> percentile for weight) and an algorithm will be developed to control*  
509 *target set point temperatures in these infants.*

510

511 **3.2 Current status of trials evaluating cooling for HIE initiated < 6 hours of age:** The  
512 current management of encephalopathy in the NICHD Neonatal Network Centers is to  
513 provide whole body cooling to 33.5°C for 72 hours. Centers in the Cool Cap study  
514 currently offer selective head cooling at all centers. The Total Body Cooling (TOBY)  
515 trial recruited 325 infants and demonstrated that among survivors, cooling resulted in  
516 reduced risks of CP, and improved scores on the BSID MDI and PDI and the GMFCS.  
517 The Infant Cooling Evaluation (ICE) trial terminated enrollment at 218 infants (total  
518 sample size was 276) due to “lack of equipoise among the investigators”. The European  
519 trial (Neo. network website) was terminated because “current evidence of the benefit of  
520 therapeutic hypothermia did not justify further randomization”. The ICE and the  
521 European trial results are pending publication. The primary outcome of both the  
522 completed and ongoing hypothermia trials are outcome at 18-22 months of age; hence 3-  
523 5 years must elapse following enrollment of the first study subject to examine the  
524 endpoint of death and disability.

525

526 **3.3 Current Status of Pediatric Trials:** The NICHD Pediatric Critical Care Network has  
527 initiated a protocol titled: Whole Body Cooling to 32.0°C to 34.0°C for Cardiac Arrest  
528 (subjects 48 hours of age to 18 years). The Wayne State University NRN PI (Seetha  
529 Shankaran MD) is a member of the Steering Committee of this trial.

530

## 531 **4.0 STUDY DESIGN**

532

533 This will be a prospective, randomized, 2 X 2 factorial design multi-center trial  
534 conducted by the NICHD Neonatal Research Network. The individual factors to be tested  
535 will be:

- 536 1) A prospective comparison of 2 cooling durations (72 vs.120 hours)
- 537 2) A prospective comparison of 2 different depths of cooling (esophageal  
538 temperatures of 33.5°C vs. 32.0°C)

539

### 540 **4.1 Primary Hypothesis:**

- 541 1) Relative to infants receiving whole body cooling for 72 hours, cooling for 120  
542 hours will reduce death or disability
- 543 2) Relative to infants receiving whole body cooling at an esophageal temperature of  
544 33.5°C, cooling to an esophageal temperature of 32.0°C will decrease death or  
545 disability

546 **4.2 Secondary Hypotheses:**

- 547 1) There will be no statistical interaction between the two factors tested in this trial  
548 2) Cooling to a greater depth and/or longer duration will result in the following:  
549 a. No increase in acute adverse events among infants cooled for 120 hours  
550 b. No increase in acute adverse events among infants cooled to 32.0°C  
551 c. Mean Cognitive score at 18-22 months of age will be higher among infants cooled  
552 for 120 hours  
553 d. Mean Cognitive score at 18-22 months will be higher among infants cooled to  
554 32.0°C  
555

556 A factorial design has been selected because the conditions are ideal for such an approach  
557 (Piantadosi 05). Namely, the interventions can be administered together without  
558 significantly changing the intensity/magnitude of each in the presence of the other. In  
559 addition, there is interest in learning about the effect of the two combined interventions  
560 on outcome, and large statistical interactions between the 2 treatments (longer cooling,  
561 deeper cooling) are not anticipated. The mechanisms of neuroprotection associated with  
562 longer or deeper cooling are likely to be similar to mechanisms associated with  
563 neuroprotection using shorter or lesser degrees of hypothermia but may differ in the  
564 extent of mechanisms involved.  
565

566 Since safety and feasibility of cooling infants with HIE to the duration and depth  
567 proposed in this study has not been performed to date, the Data Safety Monitoring  
568 Committee (DSMC) of the NRN will examine data after the first 40 subjects (10 in each  
569 arm of the factorial design) are randomized into the proposed study. Enrolment will be  
570 temporarily halted while the DSMC reviews the first interim analysis for safety and will  
571 be resumed after the DSMC, on review of this data, decides that recruitment may  
572 commence. This approach is similar to the first RCT of whole body hypothermia  
573 performed by the NRN in 1998 where 20 infants were cooled to 34.5°C vs. control with  
574 no adverse events (Shankaran 02) before the whole body hypothermia trial was initiated  
575 with cooling to 33.5°C.  
576

577 **4.3 Inclusion Criteria:** The inclusion criteria are similar to the first whole body  
578 hypothermia for HIE trial (Shankaran 05). All infants with a gestational age  $\geq 36$  weeks  
579 will be screened for study entry if they are admitted to the NICU with an admitting  
580 diagnosis of fetal acidosis, perinatal asphyxia, neonatal depression or encephalopathy.  
581 Infants will be evaluated by physiological criteria, followed by a neurological  
582 examination. Eligibility criteria will include a pH  $\leq 7.0$  or a base deficit  $\geq 16$  mEq/L  
583 on umbilical cord or any postnatal sample within 1 hour of age. If, during this interval, a  
584 pH is between 7.01 and 7.15, a base deficit is between 10 and 15.9 mEq/L, or a blood gas  
585 is not available, additional criteria will be required. These include an acute perinatal  
586 event and either a 10-minute Apgar score  $\leq 5$  or assisted ventilation initiated at birth and  
587 continued for at least 10 minutes. Once these criteria are met, all infants will have a  
588 standardized neurological examination performed by a certified physician examiner.  
589 Infants will be candidates for the study when encephalopathy or seizures are present.  
590 Encephalopathy will be defined as the presence of 1 or more signs in 3 of the following 6  
591 categories: 1) level of consciousness: lethargy, stupor or coma; 2) spontaneous activity:



592 decreased, absent; 3) posture: distal flexion, decerebrate; 4) tone: hypotonia, flaccid or  
 593 hypertonia, rigid; 5) primitive reflexes: a) suck, weak, absent; b) Moro, incomplete,  
 594 flaccid; and 6) autonomic nervous system: a) pupils: constricted, unequal, skew deviation  
 595 or non reactive to light; b) heart rate: bradycardia, variable heart rate or c) respiration:  
 596 periodic breathing, apnea. Infants will be classified as moderate or severe encephalopathy  
 597 based on a predefined algorithm. Determination of the stage of encephalopathy will be  
 598 based on a modified Sarnat stage by scoring the presence of moderate or severe  
 599 abnormalities in 6 categories. The number of moderate or severe signs determines the  
 600 extent of encephalopathy and if signs are equally distributed the designation of moderate  
 601 or severe encephalopathy will be based on the level of consciousness. Multiple births  
 602 will be enrolled in the same arm of the study.

603  
 604 **4.4 Exclusion Criteria:** Exclusion criteria will include the following: a) inability to  
 605 randomize by 6 hours of age, b) major congenital abnormality, c) major chromosomal  
 606 abnormality (including Trisomy 21), d) severe growth restriction ( $\leq 1800\text{gm}$  birth  
 607 weight), e) infant is moribund and will not receive any further aggressive treatment,  
 608 f) refusal of consent by parent or g) refusal of consent by attending neonatologist. In  
 609 addition, infants with a core temperature  $< 32.5^{\circ}\text{C}$  for  $\geq 2$  hours at the time of  
 610 randomization by the research team would not be eligible for the study.

611  
 612 **4.5 Randomization and Stratification:** After informed consent is obtained, infants with  
 613 moderate /severe encephalopathy will be randomized to either usual depth of cooling (at  
 614  $33.5^{\circ}\text{C}$ ) or deeper cooling (at  $32.0^{\circ}\text{C}$ ), and then to usual length of cooling (for 72 hours)  
 615 or longer cooling (for 120 hours). This double randomization will create the four groups  
 616 shown in **Figure 2** below.

617  
 618 **Figure 2:** Design outline of proposed trial

|                                |                                | <i>Depth of Cooling</i>     |                             | <b>Margin</b> |
|--------------------------------|--------------------------------|-----------------------------|-----------------------------|---------------|
|                                |                                | <i>33.5°C<br/>(Group A)</i> | <i>32.0°C<br/>(Group B)</i> |               |
| <i>Duration of<br/>Cooling</i> | <i>72 hours<br/>(Group X)</i>  | <i>AX</i>                   | <i>BX</i>                   | <b>X</b>      |
|                                | <i>120 hours<br/>(Group Y)</i> | <i>AY</i>                   | <i>BY</i>                   | <b>Y</b>      |
| <b>Margin</b>                  |                                | <b>A</b>                    | <b>B</b>                    |               |

620  
 621 Randomization will be conducted using permuted block design and stratified by clinical  
 622 site and stage of encephalopathy. Telephone randomization will occur 24 hours a day, 7  
 623 days a week, by the Data Coordinating Center at RTI International, Research Triangle  
 624 Park, NC. Randomization should occur within 6 hours of age. Cooling will occur at  $< 6$   
 625 hours for all eligible infants since this is usual care at all NRN sites.

626  
 627 **4.6 Intervention:** Care-givers will not be masked to therapy. All infants will be cooled  
 628 using the Cincinnati Sub-Zero Hyper-Hypothermia Blanketrol System. An esophageal  
 629 temperature probe will be placed in the lower third of the esophagus and the probe will be

630 interfaced with the Blanketrol System. The esophageal temperature will be controlled in  
631 the automatic control mode (“servo”) at the target temperature for the duration of cooling.  
632 At the completion of cooling, the control set point will be increased 0.5°C per hour until  
633 the esophageal temperature is  $\geq 36.5$  °C for four hours. Once achieved, the esophageal  
634 probe will be removed, the infant will be taken off the cooling/heating blanket, and  
635 continued temperature control will be adjusted per skin temperature if servo- controlled,  
636 or environmental temperature if in an incubator (not on servo) to maintain temperature  
637 (axillary) between 36.5°C and 37.0°C.

638  
639 The esophageal temperatures of all infants will be monitored closely on an ongoing basis  
640 to evaluate overshoot, depth of overshoot and time to equilibration. In addition, decreases  
641 of temperature following the initial overshoot and following equilibration will be  
642 monitored on an on-going basis. The type and timing of sedatives, analgesics and  
643 anticonvulsants will be recorded; use of these medications will be based on site practices.  
644

645 **4.7 Algorithm to prevent decreases of temperature to less than 31.0°C:** Infants  
646 assigned to 32.0°C arms of the study will have the target temperature set at 33.5°C  
647 initially. Once equilibration with 33.5°C is achieved (after overshoot) then the target will  
648 be reset to 32.0°C. All temperatures recorded  $< 32.0$ °C will be reviewed on an on-going  
649 basis.

650  
651 **4.8 Discontinuation of Hypothermia:** Infants will exit the assigned hypothermia  
652 intervention arm of the study if any of the following occur: parents withdraw consent,  
653 neonatologist withdraws consent or infant requires ECMO. Discontinuation of  
654 hypothermia for a serious adverse event requiring therapy (one or more of the following:  
655 cardiac arrhythmia, persistent acidosis, major thrombosis or bleeding or extensive skin  
656 breakdown) will be at the discretion of the attending physician after consultation with the  
657 study/site PI. If hypothermia is discontinued, rewarming will occur at 0.5°C per hour with  
658 further management per usual care at the site. The infant will continue to be part of the  
659 study as per intent-to-treat study protocol (unless parents explicitly withdraw permission  
660 to use any data).

661  
662 **4.9 Withdrawal of Support or Limitation of Care:** Decisions made with the family to  
663 limit or withdraw care will be documented. If the Study PI is the attending physician, a  
664 neonatologist other than the Study PI is encouraged to participate in these discussions. A  
665 neurological examination will be performed on the day support is withdrawn.  
666

667 **4.10 Post Randomization Exclusion of Infants:** The study is designed as intent-to-  
668 treat, and therefore infants will not be excluded after randomization.

669  
670 **4.11 Safety Monitoring of Control and Experimental Infants:**

- 671 a. Skin, esophageal, axillary, and servo set point temperature will be monitored  
672 every 15 minutes for the first 4 hours, every hour up to 12 hours, followed by  
673 every 4 hours during the maintenance phase of cooling and every 2 hours during  
674 the rewarming phase until normothermia is achieved.
- 675 b. Metabolic status: serum electrolytes will be monitored as per clinical routine.

- 676 c. Respiratory status: blood gases will be monitored every 4 to 6 hours. Since  
677 lower target temperatures (< 33.5°C) may be associated with risk of pulmonary  
678 hypertension, more frequent gas measurements may be required.
- 679 d. Cardiovascular: heart rate, blood pressure and use of inotropic agents will be  
680 recorded at baseline and every 4 hours throughout the study period. The risk of  
681 cardiac arrhythmia may be increased at < 33.5°C hence risk will be monitored  
682 along with treatment for arrhythmia. Echocardiograms will be performed as per  
683 site practice.
- 684 e. Renal status: urine output and body weight will be recorded daily during the  
685 intervention interval. Serum BUN and creatinine will be obtained at baseline  
686 and daily as per clinical routine.
- 687 f. Neurological status: To monitor for possible sagittal sinus thrombosis, a subset  
688 of infants will require a cranial sonogram performed within 48-72 hours  
689 following the end of the intervention period. Neurological examinations will be  
690 performed at baseline, following study intervention, pre-discharge and at time  
691 of withdrawal of support. The presence of seizures at baseline, during  
692 intervention and during rewarming will be recorded. All infants with clinical  
693 seizures will have EEG evaluations performed.
- 694 g. Hematological: Platelet counts will be obtained daily. PT/PTT will be obtained  
695 per clinical routine or if bleeding is suspected based upon clinical symptoms or  
696 an unexplained fall in hematocrit by more than 10%. Complete blood counts  
697 will be monitored as per clinical routine, including white blood counts and  
698 absolute neutrophil counts because of potential risk of infection. Since increased  
699 viscosity is also a potential problem at lower temperatures, a high index of  
700 suspicion will be maintained for complications associated with increased  
701 viscosity (such as thrombotic events, NEC).
- 702 h. Infectious Disease: Results of blood and CSF cultures will be recorded. In  
703 addition, the incidence of pneumonia (defined as infiltration on chest radiograph  
704 accompanied by increase in ventilatory support) and blood stream infections  
705 during intervention and during entire hospitalization will be noted.
- 706 i. All infants will have neonatal cranial MRI between 7 and 14 days, to evaluate  
707 the impact of lower target temperature and longer duration of cooling on  
708 cortical vs. deep gray matter. If clinically indicated, the MRI may be obtained  
709 outside this window. Central reading of MRI will proceed following approval of  
710 MRI secondary study. Classification of MRI abnormalities will be based on the  
711 current NICHD NRN study evaluating the association of MRI abnormalities in  
712 the neonatal period and neuroprotection with hypothermia.
- 713 j. Liver function tests (including AST, ALT and bilirubin) will be obtained at  
714 baseline and at end of study intervention.
- 715 k. Evaluate for presence of aseptic subcutaneous fat necroses during the entire  
716 study period.

717

718 **4.12 Treatment of Hyperthermia:** Infants will be monitored for hyperthermia during  
719 the first 10 days of life. Hyperthermia will be treated as per usual care at the site.

720 **4.13 Follow-up:** All surviving infants will be followed to 18-22 months of age in the  
721 Neonatal Research Network Follow-Up Program with a compliance rate maintained at  
722 90%. Tracking information will be recorded at the time of discharge from the NICU. An  
723 attempt will be made to obtain an autopsy in case of death occurring prior to and  
724 following NICU discharge. Growth parameters, a neurological examination and  
725 psychometric testing will be performed and vision and audiometric assessments will be  
726 recorded. Individuals performing the psychometric testing and the neurological  
727 evaluations will be masked to intervention status and they will undergo training and  
728 annual certification as per NICHD NRN Follow-Up protocol. In addition, the family's  
729 socio-economic and educational status will be assessed. If an infant is not evaluated at the  
730 18-22 month clinic visit because of acute illness, behavior problems, or "other" reasons,  
731 appointments will be re-scheduled until the evaluation is complete.  
732

733 **4.14 Primary Outcome:** The primary outcome will be death or disability (either  
734 moderate or severe in extent) at 18-22 months of age. *Severe disability* will be defined  
735 by any of the following: a Bayley III Cognitive score < 70, Gross Motor Functional  
736 (GMF) Level of III-V, blindness or profound hearing loss (inability to understand  
737 commands despite amplification). *Moderate disability* will be defined as a Bayley  
738 Cognitive score 70-84 and either a GMF level of II, a currently active seizure disorder, or  
739 a hearing deficit requiring amplification to understand commands. Infants without the  
740 primary outcome will be categorized as normal or mildly impaired. *Normal* will be  
741 defined by a cognitive score  $\geq 85$  and absence of any neurosensory deficits. *Mild*  
742 *impairment* will be defined by a cognitive score 70-84, or a cognitive score  $\geq 85$  and any  
743 of the following: presence of a GMF level 1-II, seizure disorder or hearing loss not  
744 requiring amplification.  
745

746 **4.15 Secondary Outcomes:** These include number of deaths in the NICU and following  
747 discharge, number of infants with mild, moderate and severe disability, number of infants  
748 for whom aggressive care is withdrawn, adverse events (severe bradycardia, acidosis,  
749 bleeding, thrombotic or ischemic CNS abnormalities), clinical neonatal seizures and  
750 severe neonatal MRI abnormalities (defined by the NRN study evaluating MRI  
751 abnormalities). The treatment effect on the primary outcome by level of encephalopathy  
752 (with the understanding that the study is not powered for this analysis) will be evaluated.  
753 The MRI will be obtained between 7-14 days of age because of ongoing changes in brain  
754 injury; this timing is later than recommended by the Quality Standards Subcommittee of  
755 the American Academy of Neurology and the Practice Committee of the Child Neurology  
756 Society (Ment 02). If it is found that clinical MRI studies are performed outside this  
757 window as part of usual care at participating centers, the studies performed closest to day  
758 7 may need to be evaluated separately from those performed after 8 days of age since  
759 cooling may delay the evolution of brain lesions and imaging performed too soon after  
760 hypothermia may not reflect the ultimate appearance of lesions. Once the MRI secondary  
761 study is approved, two central readers (Drs Patrick Barnes and Nancy Rollins) will  
762 evaluate the clinical MRI on a rolling basis, within 1 month of MRI being shipped to the  
763 central readers. The intra-observer reliability of the central readers will be established  
764 prior to initiation of the readings.

765

766 **Primary outcome**---death or disability (moderate or severe) at 18-22 months of age

767 **Secondary outcomes**

768 Normal infants

769 Mildly disabled infants

770 Mortality (including support withdrawn)

771 Cognitive outcome

772 Cerebral palsy

773 Disability by stage of HIE

774 Visual impairment

775 Hearing impairment

776 Multiple disabilities

777 Acute adverse events

778 Multiorgan dysfunction

779 Neonatal seizures

780 MRI findings (based on NICHD summary classification)

781 Length of hospital stay

782 Rehospitalizations after discharge

783 Post neonatal deaths

784 Growth parameters at follow up

785 Bayley III Motor score

786

## 787 **5. STATISTICAL CONSIDERATIONS**

788

789 **5.1 Sample Size:** Sample size calculations for this 2x 2 factorial design assume that there  
790 are no large statistical interactions between the 2 factors being tested --- longer and  
791 deeper cooling. Note that this does not preclude us from testing for the presence of such  
792 an interaction (indeed, it figures as the first secondary hypotheses presented earlier), but  
793 that we are not powering the trial to detect such an interaction.

794

795 In a 2 by 2 factorial design we are essentially superimposing one trial on another -- in this  
796 case, a trial of longer vs. usual duration of cooling, and a trial of deeper vs. usual depth of  
797 cooling. So, unless we want to power for a statistical interaction (which we are not doing  
798 here), we power such a trial for a comparison between the 2 groups ("outside the table",  
799 or marginal analysis) -- longer vs. usual duration of cooling (regardless of depth of  
800 cooling), i.e., groups X vs. Y in Fig. 2 or deeper vs. usual depth of cooling (regardless of  
801 duration of cooling), i.e., groups A vs. B in Fig. 2.

802

803 The following event rates in the 4 cells of the factorial trial design are assumed:  
804 AX=45%, AY=BX=30%, BY=25%. An event rate of 45% for the control group (standard  
805 duration of cooling for 72 hours and standard depth of cooling to 33.5°C) is assumed  
806 based on the primary outcome of the NICHD RCT of whole body hypothermia for HIE  
807 (Shankaran 05). An event rate of 30% in AY and BX is an estimate. We acknowledge the  
808 event rates will depend on proportion of infants with moderate and severe HIE. We  
809 assume that BY (with the longer and deeper cooling combined) would have the lowest  
810 event rate of 25%. However, we are aware that this group may also be at highest risk for

811 complications of longer and deeper cooling. Assuming that we are principally interested  
812 only in testing the marginal effects of A vs. B or X vs. Y (which translates into a  
813 comparison of event rates of 37.5% vs. 27.5%), a sample size of 363 per group (A or B,  
814 or X or Y), for a total of 726, is needed with a two-tailed test, with Type I error set at 5%,  
815 power set at 80%, and allowing for 5% loss to follow up.

816

817 Two approaches will be used to monitor duration of the trial. Sites will be encouraged to  
818 increase the number of certified examiners, so that no eligible infant is missed. Secondly,  
819 the total duration of enrollment will be limited to 5 years.

820

821 It is possible that randomization would be discontinued for one group because of an  
822 unacceptable rate of adverse events in the neonatal period. In this scenario, more infants  
823 would then be randomized to the other three groups during the remainder of the trial.  
824 Assuming that the overall enrollment rate was unaffected, the number of patients would  
825 be increased for each of the three remaining groups over the number had infants been  
826 randomized to four groups. The power to conduct analyses at the margins as  
827 conventionally performed for a factorial trial would be decreased. However, there would  
828 no longer be interest in whether to use a treatment which has an unacceptable neonatal  
829 adverse event rate. With greater enrollment in the 3 remaining groups, the power to  
830 compare these specific 3 groups would not be compromised and in actuality would be  
831 somewhat higher than had the study been conducted as originally planned. (The same  
832 thinking would apply in the unlikely event that randomization was discontinued in two  
833 groups.)

834

835 **5.2 Data Analyses.** All data analyses will be performed according to the intention-to-  
836 treat principle. There are 2 main outcomes of this factorial design –effect of 120 hours  
837 cooling vs. 72 hours cooling and effect of 32.0°C vs. effect of 33.5°C, hence “at the  
838 margins” analyses will be carried out, testing for differences between groups X and Y,  
839 and groups A and B, from Fig. 2 (McAlister 03). We are aware that such “at the  
840 margins” analysis underestimates the efficacy of the new therapies when the interaction is  
841 antagonistic, while it overestimates efficacy when the interaction is synergistic  
842 (McAlister 03). On the other hand, “inside the table” analyses (pair-wise comparisons of  
843 groups BX, AY and BY, with group AX) use only half as many patients; the confidence  
844 intervals around treatment estimates are much wider for “inside the table” than for “at the  
845 margin” analysis and the use of the same control group (33.5 °C for 72 hours) creates a  
846 problem with multiple comparisons. Since our trial is not expressly powered for this  
847 purpose, “inside the table” analyses will only be pursued in this protocol as a secondary  
848 objective to test for statistical interactions.

849

850 The data in the two groups in the factorial design will be analyzed for treatment group  
851 differences with Chi square or Fisher’s exact tests for the categorical variables and with t-  
852 tests for the continuous variables. The primary and secondary outcomes will be analyzed  
853 using robust Poisson regression models (for binary outcomes) to generate risk ratios  
854 adjusting for the stratification variables (level of HIE and site). The NICHD NRN DSMC  
855 will monitor progress of the study for safety at pre-specified time points. The DSMC will

856  
857  
858  
859  
860  
861  
862  
863  
864

be required to evaluate safety of greater depth and longer duration of cooling after the every 25 infants have been enrolled in the trial.

The Bayesian analyses for different scenarios are note below:

Factorial design with total of 726 subjects (363 per group, A or B, or X or Y) comparing event rates of 37.5% vs. 27.5%

|                    | Posterior Probability of Benefit     |             |                                       |            |                                       |            |
|--------------------|--------------------------------------|-------------|---------------------------------------|------------|---------------------------------------|------------|
|                    | >0% reduction in death or impairment |             | >10% reduction in death or impairment |            | >20% reduction in death or impairment |            |
|                    | Prior                                | Posterior   | Prior                                 | Posterior  | Prior                                 | Posterior  |
| <b>Perspective</b> |                                      |             |                                       |            |                                       |            |
| Neutral            | <b>.50</b>                           | <b>.997</b> | <b>.37</b>                            | <b>.96</b> | <b>.25</b>                            | <b>.72</b> |
| Skeptical          | <b>.30</b>                           | <b>.99</b>  | <b>.21</b>                            | <b>.94</b> | <b>.13</b>                            | <b>.67</b> |

865  
866  
867  
868  
869

Factorial design with a total of 726 subjects (363 per group) comparing event rates of 35% vs. 30%

|                    | Posterior Probability of Benefit     |            |                                       |            |                                       |            |
|--------------------|--------------------------------------|------------|---------------------------------------|------------|---------------------------------------|------------|
|                    | >0% reduction in death or impairment |            | >10% reduction in death or impairment |            | >20% reduction in death or impairment |            |
|                    | Prior                                | Posterior  | Prior                                 | Posterior  | Prior                                 | Posterior  |
| <b>Perspective</b> |                                      |            |                                       |            |                                       |            |
| Neutral            | <b>.50</b>                           | <b>.92</b> | <b>.37</b>                            | <b>.64</b> | <b>.26</b>                            | <b>.21</b> |
| Skeptical          | <b>.30</b>                           | <b>.89</b> | <b>.21</b>                            | <b>.58</b> | <b>.13</b>                            | <b>.17</b> |

870  
871  
872  
873  
874

Factorial design with total of 516 subjects (258 per group, A or B or X or Y) comparing event rates of 37.5% vs. 27.5%

|                    | Posterior Probability of Benefit     |            |                                       |            |                                       |            |
|--------------------|--------------------------------------|------------|---------------------------------------|------------|---------------------------------------|------------|
|                    | >0% reduction in death or impairment |            | >10% reduction in death or impairment |            | >20% reduction in death or impairment |            |
|                    | Prior                                | Posterior  | Prior                                 | Posterior  | Prior                                 | Posterior  |
| <b>Perspective</b> |                                      |            |                                       |            |                                       |            |
| Neutral            | <b>.50</b>                           | <b>.99</b> | <b>.37</b>                            | <b>.92</b> | <b>.26</b>                            | <b>.66</b> |
| Skeptical          | <b>.30</b>                           | <b>.98</b> | <b>.21</b>                            | <b>.89</b> | <b>.13</b>                            | <b>.60</b> |

875  
876  
877  
878  
879

Factorial design with total of 516 subjects (258 per group, A or B or X or Y) comparing event rates of 35% vs. 30%

|             | Posterior Probability of Benefit     |           |                                       |           |                                       |           |
|-------------|--------------------------------------|-----------|---------------------------------------|-----------|---------------------------------------|-----------|
|             | >0% reduction in death or impairment |           | >10% reduction in death or impairment |           | >20% reduction in death or impairment |           |
| Perspective | Prior                                | Posterior | Prior                                 | Posterior | Prior                                 | Posterior |
| Neutral     | .50                                  | .87       | .37                                   | .60       | .26                                   | .24       |
| Skeptical   | .30                                  | .83       | .21                                   | .53       | .13                                   | .18       |

880  
881  
882  
883  
884  
885  
886  
887  
888  
889  
890  
891  
892  
893  
894  
895  
896  
897  
898  
899  
900  
901  
902  
903  
904  
905  
906  
907  
908  
909  
910  
911  
912

### 5.3 Monitoring of Safety for the Trial:

- The protocol will be reviewed by the Institutional Review Board of each participating institution.
- The first interim analysis for safety will be conducted after 40 infants are enrolled (10 in each arm of the factorial design). Enrolment will be temporarily halted while the DSMC reviews the first interim analysis for safety and will be resumed only after the DSMC, on review of this data, is convinced that recruitment may commence.
- Following approval of the DSMC, the temperature data on the infants in the intervention arm of the study will be monitored by the PI and Subcommittee on an ongoing basis to document drops of temperature below target and plans to minimize this complication will be developed. There will be increased vigilance looking for potential complications of a greater depth of hypothermia on cardiac function, increased infection rates, increased bleeding or effects of increased viscosity.
- Serious adverse events will be reported on the MedWatch form to RTI. After the initial interim analysis for safety, serious adverse events will be compared between the treatment groups using sequential analysis methods after every 25 infants have been accrued into the trial. The 2 events that will be monitored include *arrhythmia* requiring therapy (excluding sinus rhythm or mechanical line-placement as a cause) and *major bleeding or thrombosis*. Neonates will be monitored with daily platelet counts and coagulation profile/CBC as clinically indicated. On-going masked central reading of cranial MRI will be undertaken once the MRI secondary study is approved, for evidence of CNS infarct/hemorrhage that is higher than the frequency noted in the NRN study evaluating cranial MRI among infants in the whole body hypothermia for neonatal HIE. The computed statistic will be compared to Pocock boundaries that are constructed beforehand so that an overall alpha level of 5% is maintained. RTI will be responsible for reporting adverse events to the DSMC of the Network.
- All protocol deviations/violations will be monitored by RTI.
- RTI will prepare reports for presentation to the DSMC at periodic intervals.
- DSMC will be responsible for monitoring the safety of the trial. Pre-specified looks will occur at 25%, 50%, 75% and 100% of data accrual at the conclusion of the study intervention.



- Efficacy of the trial with respect to the primary outcome will be monitored during the above specified looks at the data, as feasible, based on recruitment and follow up data accrual.

## 6.0 DURATION OF THE STUDY

The duration of the study is estimated to be 5 years for enrollment and 1.5 years for follow up, with a total of 6.5 years. This projection is based on a survey conducted in June 2009 of all the current NICHD NRN sites to examine study feasibility (see enclosed survey results). To summarize, the number of infants who have undergone whole body hypothermia at < 6 hours of age with eligibility criteria similar to the current proposal is as follows: In 2006, with 11 sites performing cooling for HIE, 108 infants were cooled. In 2007, with 12 sites, this number was 116. In 2008 200 infants were cooled while in 2009 with data from satellite sites (Duke University, Yale University and Wayne State University), 90 infants were cooled between January 1 and May 31 2009.

The consent rate for the first NICHD trial of hypothermia for HIE was 87% (208 of 239 eligible, Shankaran 05). We anticipate a similar consent rate for the proposed study. The proposed study has estimated a 5% loss to follow up rate; however, it should be noted that the first NICHD NRN trial of hypothermia for HIE had primary outcome data available for 205/208 infants (Shankaran 05). Therefore, with a high consent rate, we are confident we can enroll 726 subjects prior to 5 years and complete follow up with a high compliance rate in an additional 1.5 years.

## 7.0 CONCLUSIONS

The goal of this protocol is to refine the intervention of whole body hypothermia for neonatal hypoxic-ischemic encephalopathy among term infants by testing both a longer duration of cooling and a greater depth of cooling. We anticipate recruitment into this study will be completed before newer pharmacological therapies (i.e. Erythropoietin) are ready to be in tested in randomized controlled trials following completion of pharmacokinetic, safety and efficacy studies with these agents (Juul 08, Fauchere 08).

The NICHD NRN is uniquely positioned to perform this trial; term infants with neonatal HIE are a non-competing population for research in the Network. A short study start-up time is expected as NRN sites are already trained, and have the equipment, study forms and manual of operations based on prior and on-going hypothermia studies. This study would encourage standard management of cooled infants regardless of randomization group, while optimizing cooling strategies as neuroprotection for neonatal hypoxic-ischemic encephalopathy.

## 8.0. SUGGESTED SECONDARY STUDIES

- 1) Fetal Heart Rate tracings and outcome (central reader for tracings)
- 2) aEEG amplitude and outcome during longer, deeper cooling (Van Meurs)
- 3) Impact of sedatives/analgesics/anticonvulsants levels on aEEG background (Pappas)

- 959 4) Economic analysis of neuroprotection with hypothermia  
960 5) Platelet activation and aggregation with longer, deeper cooling (Rajpukar)  
961 6) Biomarkers of brain injury during longer, deeper cooling (Everett/Shankaran)  
962 7) Genetic markers of HIE (Schibler, Cotton)  
963 8) Cytokines and longer/deeper cooling in HIE (Carlo)  
964 9) Hypercoagulable states during longer deeper cooling (Shankaran)  
965 10) Outcome following low Apgar scores (Laptook)  
966 11) Neonatal MRI as a predictor of outcome with longer, deeper cooling (Shankaran,  
967 Pappas, Barnes, Rollins)  
968 12) The role of hypocarbia in neonatal HIE (Pappas)  
969 13) Renal dysfunction in neonatal HIE (Myers, Bell)  
970 14) aEEG during Rewarming (Chalak, Sanchez, Pappas, Shankaran, Laptook, Huet)  
971 15) Referral hospital and transport practices for neonates with HIE (Bara, Grisby,  
972 Huitema)

## REFERENCES

1. Azzopardi DV, Edwards AD. Hypothermia. *Seminars in Fetal & Neonatal Medicine*. 2007;12:303-310.
2. Azzopardi DV, Wyatt JS, Cady EB, Delpy DT, Baudin J, Stewart AL, Hope PL, Hamilton A, Reynolds EOR. Prognosis of newborn infants with hypoxic-ischemic brain injury assessed by phosphorus magnetic resonance spectroscopy. *Pediatr Res*. 1989;25:445-451.
3. Barks JD. Current controversies in hypothermic neuroprotection. *Seminars in Fetal and Neonatal Medicine* 2008; 13:30-34.
4. Battin M, Bennet L, Gunn AJ. Rebound seizures during rewarming. *Pediatrics*:2004;113:1369.
5. Bennet L, Roelfsema V, Pathipati P, Quaedackers JS, Gunn AJ. Relationship between evolving epileptic-form activity and delayed loss of mitochondrial activity after asphyxia measured by near-infrared spectroscopy in preterm fetal sheep. *J Physiol*. 2006;572:141-154.
6. Blackmon LR, Stark AR, and The Committee on Fetus and Newborn, American Academy of Pediatrics. Hypothermia: A neuroprotective therapy for neonatal hypoxic-ischemic encephalopathy. *Pediatr*. 2006;117:942-948.
7. Bona E, Hagberg H, Løberg EM, Bågenholm R, Thoresen M. Protective effect of moderate hypothermia after neonatal hypoxia-ischemia: Short and long term outcome. *Pediatr Res* 1998;43:738-745.
8. Bramlett HM, Dietrich WD. Progressive damage after brain and spinal cord injury; pathomechanisms and treatment strategies. *Prog Brain Res*. 2007; 161:125-141.
9. Brown G, and Bal-Price A. Inflammatory neurodegeneration mediated by nitric oxide, glutamate and mitochondria. *Mol Neurobiol* 2003;27:3;325-355.
10. Busto R, Dietrich WD, Globus MYT, Valdes I, Scheinberg P, Ginsberg MD. Small differences in intraischemic brain temperature critically determine the extent of ischemic neuronal injury. *J Cereb Blood Flow Metab* 1987;7: 729-738.
11. Carroll M, Beek O. Protection against hippocampal CA cell loss by post-ischemic hypothermia is dependent of delay of initiation and duration. *Metab Brain Dis* 1992; 7:45-50.
12. Colbourne F, Corbett D. Delayed and prolonged post-ischemic hypothermia is Neuroprotective in the gerbil. *Brain Research* 1994; 656:265-272.

13. Compagnoni G, Bottura C, Cavallaro G, Cristofori G, Lista G, Mosca F. Safety of deep hypothermia in treating neonatal asphyxia. *Neonatology* 2008;93:230-235.
14. Covey MV, Oorschot DE. Effect of hypothermic post-treatment on hypoxic-ischemic striatal injury, and normal striatal development, in neonatal rats: A stereological study. *Pediatr Res* 2007; 62:646-651.
15. Dietrich WD, Bramlett HM. Hyperthermia and central nervous system injury. *Prog Brain Res.* 2007;162:201-217.
16. Edwards AD, Azzopardi DV. Therapeutic hypothermia following perinatal asphyxia. *Arch Dis child Fetal Neonatal Ed* 2006; 91:F127-F131.
17. Eicher DJ, Wagner CL, Katikaneni LP, Hulsey TC, Bass WT, Kaufman DA, Horgan MJ, Languani S, Bhatia J, Givelichian LM, Sankaran K, Yager JY. Moderate Hypothermia in Neonatal Encephalopathy: Safety outcomes. *J. Pediatr Neurol* 2005; 32:18-24.
18. Eicher DJ, Wagner CL, Katikaneni LP, Hulsey TC, Bass WT, Kaufman DA, Horgan MJ, Languani S, Bhatia J, Givelichian LM, Sankaran K, Yager JY. Moderate Hypothermia in Neonatal Encephalopathy: Efficacy outcomes. *J. Pediatr Neurol* 2005;32:11-17.
19. Fauchère JC, Dame C, Vonthein R, Koller B, Arri S, Wolf M, and Bucher WU. An approach to using recombinant erythropoietin for neuroprotection in very premature infants. *Pediatrics* 2008; 122:2:375-382.
20. Gerrits LC, Battin MR, Bennet L, Gonzalez H, Gunn AJ. Epileptiform activity during rewarming from moderate cerebral hypothermia in near-term fetal sheep. *Pediatr Res* 2005; 57:342-346.
21. Gluckman PD, Wyatt J, Azzopardi DV, Ballard R, Edwards AD, Ferriero DM, Polin RA, Robertson CM, Thoresen M, Whitelaw A, Gunn AJ, on the behalf of the Cool Cap Study Group. Selective head cooling with mild systemic hypothermia after neonatal encephalopathy: Multicenter randomised trial. *Lancet.* 2005;365:663-70.
22. Gressens P (ed). Neuroprotection. *Seminars in Fetal and Neonatal Medicine* 2007;239-323.
23. Gunn AJ, Gluckman PG. Head cooling for neonatal encephalopathy: State of the art: *Clin Obstet Gynecol*, September 2007; 50;(3):636-651.
24. Gunn AJ, Gunn TR, de Hann H, Williams CE, Gluckman PDI. Dramatic neuronal rescue with prolonged selective head cooling after ischemia in fetal lambs. *J Clin Invest.* 1997;99:248-256.

25. Gunn AJ, Gunn TR, Gunning MI, Williams CE, Gluckman PD. Neuroprotection with prolonged head cooling started before post ischemic seizures in fetal sheep. *Pediatrics* 1998; 102:1098-1106.
26. Gunn AJ, Thoresen M. Hypothermic neuroprotection. *NeuroRx*: 2006;3;2:154-169.
27. Haaland K, Loberg EM, Steen PA, Thoresen M. Posthypoxic hypothermia in newborn piglets *Pediatr Res*. 1997;41:505-512.
28. Higgins RD, Tonse RNK, Perlman J, Azzopardi DV, Blackmon LR, Clark RH, Edwards AND, Ferriero DM, Gluckman PD, Gunn AJ, Jacobs SE, Eicher DJ, Jobe AH, Luptook AR, LeBlanc MH, Palmer C, Shankaran S, Soll RF, Stark AR, Thoresen M, Wyatt J, The NICHD Hypothermia Workshop Speakers and Discussants. Hypothermia and perinatal asphyxia: Executive Summary of The National Institute of Child Health and Human Development Workshop. *J Pediatr*. 2006.
29. Iwata O, Thornton JS, Sellwood MW, Iwata S, Sakata Y, Noone MA, O'Brien PF, Bainbridge A, De Vita E, Ravich G, Peebles D, Scaravalli F, Cady EB, Ordidge R, Wyatt JS, Robertson NJ. Depth of delayed cooling alters neuroprotection pattern after hypoxia-ischemia. *Ann Neurol*. 2005;58:75-87.
30. Iwata O., Iwata S, Thornton JS, De Vita E, Bainbridge A, Herbert L, Scaravilli F, Peebles D, Wyatt JS, Cady EB, and Robertson NJ. Therapeutic time window duration decreases with increasing severity of cerebral hypoxia-ischaemia under normothermia and delayed hypothermia in newborn piglets. *Brain Research* 2007;1154;173-180.
31. Jacob S, Hunt R, Tarnow-Mordi W, Inder T, Davis P. Cooling for newborns with hypoxic ischemic encephalopathy. *Cochrane Database of Systemic Reviews* 2007;4:1-46.
32. Johnson M, Trescher W, Ishida A, Nakajima W> neurobiology of hypoxic-ischemic injury in the developing brain. *Pediatric Res* 2001;49:735-741.
33. Juul SE, McPherson RJ, Bauer LA, Ledbetter KJ, Gleason CA, Mayock DE. A phase I/II trial of high dose erythropoietin in extremely low birth weight infants: Pharmacokinetics and safety. *Pediatrics*. 2008;122:2:383-391
34. Keogh JM. Determinants of outcome after head cooling for Neonatal Encephalopathy. *Pediatrics* 2007; 120:171-172.
35. Luptook A, Tyson J, Shankaran S, McDonald S, Ehrenkranz R, Fanaroff A, Donovan E, Goldberg R, O'Shea M, Higgins R, Poole K. Elevated temperature after hypoxic-ischemic encephalopathy: A risk factor for adverse outcome. *Pediatrics* 2008 (In press)

36. Laptook AR, Corbett RJ, Sterett R, Garcia D, Tollefsbol G. Quantitative Relationship between brain temperature and energy utilization rate measured in Vivo using P and H magnetic resonance spectroscopy. *Pediatr Res* 1995; 38:919-925.
37. Lorek A, Takei Y, Cady EB, Wyatt JS, Penrice J, Edwards AD, Peebles D, Wylezinska M, Owen-Reese H, Kirkbride V, Cooper CE, Aldridge RF, Roth SC, Brown G, Delpy DT, Reynolds EOR. Delayed (secondary) cerebral energy failure after acute hypoxia-ischemia in the newborn piglet: continuous 48-hour studies by phosphorus magnetic resonance spectroscopy. *Pediatr Res*. 1994;36:699-706.
38. McAlister FA, Straus SE, Sackett DL, Altman DG. Analysis and reporting of factorial trials: A systemic review. *JAMA* 2003; 289: 19: 2545-2553.
39. Ment LR, Bada HS, Barnes P, Grant PE, Hirtz D, Papile LA, Pinto-Martin J Rivkin M and Slovis TL. Practice parameter: Neuroimaging of the neonate: Report of the Quality Standards Subcommittee of the American Academy of Neurology and the Practice Committee of the Child Neurology Society. *Neurology* 2002; 58:1726-1738.
40. Michenfelder JD, Theye RA. Hypothermia: Effect on canine brain and whole body metabolism. *Anesthesiology* 1968; 1107-1112.
41. Mishima K, Ikeda T, Yoshikawa T, Aoo N, Egashira N, Xia YX, Ikenoue T, Iwasaki K, Fugiwara M. Effects of hypothermia and hyperthermia on attention and spatial learning deficits following neonatal hypoxia-ischemic insult in rats. *Behav Brain Res* 2004;151:209-217.
42. Nedelcu J, Klein MA, Aguzzi A, Boesiger P, and Martin E., Biphasic Edema after hypoxic-ischemic brain injury in neonatal rats reflects early neuronal and late glial damage. *Pediatr Res* 1999; 46:297-304.
43. Northington F, Ferriero D, Graham E, Traystman R, and Martin L. Early neurodegeneration after hypoxia-ischemia in neonatal rat is necrosis while delayed death is apoptosis. *Neurobiol Dis* 2001;8:2:207-219.
44. O'Brien FE, Iwata O, Thornton JS, De Vita E, Sellwood MW, Iwata S, Sakata YS, Charman S, Ordidge R, Cady EB, Wyatt Js, Robertson NJ. Delayed whole body cooling to 33 to 35C and the development of impaired energy generation consequential to transient cerebral hypoxia-ischemia in the newborn piglet. *Pediatrics* 2006: 1549-1558.
45. Orrenius S, Zhivotovsky B, and Nicotera P. Regulation of cell death: the calcium-apoptosis link. *Nat Rev Mol Cell Biol* 2003;47:552-565.
46. Piantadosi, S. (2005). *Clinical Trials: A Methodological Perspective*. Second Edition. New York: John Wiley.

47. Perlman JM. Summary proceedings from the Neurology Group on hypoxic ischemic encephalopathy. *Pediatrics* 2006;117;3:S28-S33.
48. Robertson CMT, Finer NN, Grace MGA. School performance of survivors of neonatal encephalopathy associated with birth asphyxia at term. *Journal of Pediatr* 1989; 114;5:753-760.
49. Robertson NJ, Cowan FM, Cox IJ, and Edwards AD. Brain alkaline intracellular pH after neonatal encephalopathy. *Ann Neurol*.2002 Dec;52:6:732-42.
50. Robertson NJ, Cox I, Cowan F, Counsell S, Azzopardi D and Edwards A. Cerebral intracellular lactic alkalosis persisting months after neonatal encephalopathy measured by magnetic resonance spectroscopy. *Pediatr Res* 1999;46:3;287-296.
51. Robertson NJ, Iwata O. Bench to bedside strategies for optimizing neuroprotection following perinatal hypoxia-ischemia in high and low resource settings. *Early Hum Dev* 2007;12:801-811, Epub 2007.
52. Rutherford M, Srinivasan L, Dyet L, Ward P, Allsop J, Counsell S, Cowan F. Magnetic resonance imaging in perinatal brain injury: clinical presentation, lesions and outcome. *Pediatr Radiol*. 2006; 36; 582-592.
53. Schulzke SM, Rao S, Patole SJ. A systemic review of cooling for neuroprotection in neonates with hypoxic ischemic encephalopathy. *BMC Pediatrics* 2007;7:30.
54. Shah PS, Ohlsson A, Perlman M. Hypothermia to treat Neonatal Hypoxic ischemic Encephalopathy. *Arch Pediatr Adolesc Med*. 2007;161:951-958.
55. Shankaran S, Laptook A, Wright LL, Ehrenkranz RA, Donovan EF, Fanaroff AA, Stark AR, Tyson JE, Poole K, Carlo WA, Lemons J, Oh W, Stoll BJ, Papile LA, Bauer CR, Stevenson DK, Korones SB, McDonald S. Whole body hypothermia for neonatal encephalopathy: Animal observations as a basis for a randomized, controlled pilot study in term infants. *Pediatrics* 2002;110:377-385.
56. Shankaran S, Laptook AR, Ehrenkranz RA, Tyson JE, McDonald SA, Donovan EF, Fanaroff AA, Poole WK, Wright LL, Higgins RD, Finer N, Carlo WA, Duara S, Oh W, Cotton CM, Stevenson DK, Stoll BJ, Lemons JA, Guillet R, Jobe AH and the NICHD and Human Development Neonatal Research Network. Whole-body hypothermia for neonates with hypoxic-ischemic encephalopathy. *N Engl J Med*. 2005;353: 1574-1584.

57. Shankaran S, Pappas A, Laptook AR, McDonald S, Ehrenkranz RE, Tyson JE, Walsh M, Goldberg R, Higgins R, Das A for the NICHD Neonatal Research Network. Outcomes of safety and effectiveness in a multicenter randomized controlled trial of whole body hypothermia for neonatal hypoxic ischemic encephalopathy. *Pediatrics* 2008;122:e791-798
58. Shankaran S, Woldt E, Koepke T, Bedard MP, Nandyal R. Acute neonatal morbidity and long-term central nervous system sequelae of perinatal asphyxia in term infants. *Early Human Development* 1991;25:135-148.
59. Sirimanne ES, Blumberg RM, Bossano D, Gunning M, Edwards AD, Gluckman PD, Williams C. The effect of prolonged modification of cerebral temperature on outcome after hypoxia-ischemic brain injury in the infant rat. *Pediatr Res* 1996; 39:591-597.
60. Steen PA, Milde JH, Michenfelder JD. The detrimental effects of prolonged hypothermia and re-warming in the dog. *Anesthesiology*. 1980;52:224-230.
61. Steen PA, Soule EH, Michenfelder JD. The detrimental effect of prolonged hypothermia in cats and monkeys with and without regional cerebral ischemia. *Stroke*. 1979;10:522-529.
62. Taylor DL, Edwards AD, Mehmet H. Oxidative metabolism, apoptosis and perinatal brain injury. *Brain Pathol* 1999; 9:93-117.
63. Taylor DL, Mehmet H, Cady EB, Edwards AD. Improved neuroprotection with hypothermia delayed by 6 hours following cerebral hypoxia-ischemia in the 14-day-old rat. *Pediatr Res* 2002; 51:13-19.
64. The Hypothermia After Cardiac Arrest Study Group. Mild therapeutic hypothermia to improve the neurologic outcome after cardiac arrest. *N Engl J Med* 2002; 346:8:549-564.
65. Thoresen M, Bågenholm R, Løberg EM, Apricena F, Kjellmer I. Posthypoxic cooling of neonatal rats provides protection against brain injury. *Arch Dis Child* 1996;74:F3-F9.
66. Thoresen M, Penrice J, Lorek A, Cady EB, Wylezinski M, Kirkbride V, Cooper CE, Brown GC, Edwards AD, Wyatt JS, Reynolds EOR. Mild hypothermia following severe transient hypoxia-ischemic ameliorates delayed cerebral energy failure in the newborn piglet. *Pediatr Res* 1995;5:667-670.
67. Thoresen M, Simmonds M, Satas S, Tooley J, Silver IA. Effective selective head cooling during posthypoxic hypothermia in newborn piglets. *Pediatr Res* 2001; 49:594-599.



68. Tooley J, Satas S, Eagle R, Silver IA, Thoresen M. Significant selective head cooling can be maintained long-term after global hypoxia ischemia in newborn piglets. *Pediatrics* 2002; 109:643-649.
69. Tooley J, Satas S, Porter H, Silver IA, Thoresen M. Head cooling with mild systemic hypothermia in anesthetized piglets in neuroprotection. *Ann Neuro* 2003; 53:65-72.
70. Tooley JR, Eagle RC, Satas S, Thoresen M. Significant head cooling can be achieved while maintaining normothermia in the newborn piglet. *Arch Dis Child Fetal Neonatal Ed* 2005; 90:F262-F266.
71. Westgate JA, Gunn AJ, Gunn TR. Antecedents of neonatal encephalopathy with fetal academia at term. *Br Obstet Gynaecol.* 1999;106;77-782.
72. Williams G, Dardzinski BJ, Buckalew AR, Smith MB. Modest hypothermia preserves cerebral energy metabolism during hypoxia-ischemia and correlates with brain damage: A P nuclear magnet resonance study in unanesthetized neonatal rats. *Pediatr Res* 1997; 42: 700-708.
73. Wyatt JS, Gluckman PD, Liu PY, Azzopardi D, Ballard R, Edwards AD, Ferreiro DM, Polin RA, Robertson CM, Thoresen M, Whitelaw A, Gunn AJ, for the Cool Cap Study Group. Determinants of outcomes after Head Cooling for Neonatal Encephalopathy. *Pediatrics* 2007; 119 (5);912-921.
74. Yager JY, and Asselin J. Effects of mild hypothermia on cerebral energy metabolism during the evolution of hypoxic-ischemic brain damage in the immature rat. *Stroke* 1996;27:919-926.
75. Yager JY, Armstrong EA, Jaharus C, Saucier DM, Wirrell EC. Preventing hypothermia decreases brain damage following neonatal hypoxic-ischemic seizures. *Brain Research* 2004; 1011:48-57.

981 Results of the survey of NICHD Neonatal Research Networks sites of number of infants  
 982 receiving hypothermia at < 6 hours of age for neonatal HIE.

983  
 984  
 985  
 986

| NICHD Neonatal Research Network<br>Site | 2006 | 2007 | 2008 | 2009<br>(As of 5/31/2009) |
|-----------------------------------------|------|------|------|---------------------------|
| Case Western University                 | 5    | 5    | 5    | 3                         |
| University of Texas at Dallas           | 14   | 8    | 17   | 12                        |
| Wayne State University                  | 6    | 3    | 29   | 9                         |
| Emory University                        | 0    | 0    | 21   | 15                        |
| University of Cincinnati                | 7    | 5    | 8    | 3                         |
| Indiana University                      | 10   | 8    | 7    | 7                         |
| Yale University                         | 5    | 5    | 4    | 1                         |
| Brown University                        | 7    | 7    | 8    | 2                         |
| Stanford University                     | 6    | 7    | 11   | 12                        |
| University of Texas at Houston          | 15   | 20   | 20   | 6                         |
| Duke University                         | 9    | 22   | 26   | 14                        |
| Tufts University                        | 0    | 0    | 3    | 0                         |
| University of Iowa                      | 0    | 2    | 12   | 3                         |
| University of Utah                      | 0    | 0    | 16   | 0                         |
| University of New Mexico                | 0    | 0    | 3    | 2                         |
| University of Alabama                   | 24   | 24   | 12   | 5                         |
| Total                                   | 108  | 116  | 200  | 94<br>(for 5 months )     |

987

988 Note: Duke University and Wayne State University have included numbers from satellite  
 989 sites in 2008 and 2009

Appendix A

|      |                                            |
|------|--------------------------------------------|
| 990  |                                            |
| 991  |                                            |
| 992  | <b>Protocol Versions as Working Drafts</b> |
| 993  | 2007 October (concept)                     |
| 994  | April 4, 2008                              |
| 995  | August 15, 2008                            |
| 996  | September 18, 2008                         |
| 997  | November 17, 2008                          |
| 998  | June 5, 2009                               |
| 999  | July 15, 2009                              |
| 1000 | October 21, 2009                           |
| 1001 | December 16, 2009                          |
| 1002 | December 22 2009                           |
| 1003 | January 27, 2010                           |
| 1004 | March 23, 2010                             |
| 1005 | April 8, 2010                              |

Appendix B

1006  
1007  
1008  
1009  
1010  
1011

**Budget and Justification:** The following estimated budget is provided for the entire trial assuming enrollment of 726 subjects

|                           | <b>Cost per subject</b> | <b>Number</b> |                  |
|---------------------------|-------------------------|---------------|------------------|
| Main Study Capitation     | 1660                    | 726           | 1,205,160        |
| Follow up                 | 1200                    | 530           | 636,000          |
| HUS for first 40 patients | 200                     | 40            | 8,000            |
| Training meeting          | 2000                    | 16            | 32,000           |
|                           |                         |               |                  |
| Equipment and supplies    |                         |               |                  |
| Blanketrol                | 7900                    | 16            | 126,400          |
| Temperature Probes        | 60                      | 726           | 43,560           |
|                           |                         |               |                  |
| Total Direct costs        |                         |               | 2,051,120        |
| Total Indirect costs@52%  | 1,881,160               | 52%           | 978,203          |
|                           |                         |               |                  |
| <b>Total Cost</b>         |                         |               | <b>3,029,323</b> |

1012  
1013  
1014  
1015  
1016  
1017  
1018  
1019  
1020  
1021  
1022  
1023  
1024  
1025  
1026  
1027  
1028  
1029  
1030  
1031  
1032  
1033

Research time: Costs will cover time to screen and determine eligibility of patients, data collection, initiating and monitoring of the cooling intervention, and transmission of all data items.

Medical supplies: Costs will cover supplies for the Cincinnati Sub-Zero Blanketrol including Blanketrol equipment, temperature probes, thermal blankets, and temperature probe adaptors.

Follow-up: Costs will cover tracking infants, incentives to participate in Follow-up and performance of follow-up at Network sites, based on survival rate of 75% in first NICHD NRN trial.

Training meeting: The study PI and coordinator from each Network site will be required to attend one training session in conjunction with the Steering Committee prior to initiation of the trial. Funds are required to cover an additional night of lodging/meals assuming this would occur during a NRN Steering Committee meeting.

1034 **Supplement 2: Material for Bayesian Analysis of Optimizing Cooling**  
1035 **Trial**

1036 **Bayesian model and implementation**

1037 A log binomial model with level of encephalopathy and main effects of cooling duration and  
1038 depth and their interaction was used to estimate posterior median of the RRs and 95% credible  
1039 intervals (CrI). The model also included a random center effect and used neutral priors for  
1040 treatment effects centered at RR of 1 (95% prior interval, 0.5-2.0).<sup>21</sup> Weakly informative priors  
1041 were used for all other parameters to exclude large treatment effects and produce conservative  
1042 estimates of treatment effects

1043 The log binomial model used is similar to the one we previously described for  
1044 an interim analysis of the same trial [1]. Let  $y_{ij}$  indicate the primary outcome  
1045 of death or moderate or severe disability for infant  $i$  in center  $j$ . We assume  $y$   
1046 follows a Bernoulli distribution with probability  $p_{ij}$  of observing the primary  
1047 outcome. The full model is specified as:

$$\log(p_{ij}) = \beta_0 + \beta_1 \text{depth}_i + \beta_2 \text{duration}_i + \beta_3 \text{depth}_i \times \text{duration}_i + \beta_4 \text{level of HIE}_i + u_j$$

1048  $u_j \sim \text{Normal}(0, \tau^2),$

1049 where  $u_j$  is the random center effect to account for within center correlation.  
1050 The binary variables depth and duration are coded as 1 for 32.0°C and 120  
1051 hours (experimental interventions) and 0 otherwise; level of HIE is a  
1052 stratifying variable coded as 1 for severe (0 for moderate).

1053 We used Normal(0,1) priors for  $\beta_0$  and  $\beta_4$ . This prior is mildly informative  
1054 since it excludes relative risk effects  $> 7$  ( $< 0.14$ ). For  $\beta_1$  and  $\beta_2$ , we used  
1055 neutral priors in the log RR scale of Normal(0, 0.35<sup>2</sup>), which have a 95% prior  
1056 interval of 0.5–2.0 in the RR scale. For the interaction term  $\beta_3$ , we used a  
1057 Normal(0, 0.14<sup>2</sup>) prior which a priori gives a very small probability of 0.025  
1058 of a qualitative interaction (meaning that the effect of longer cooling on the  
1059 outcome changes direction in the presence or absence of deeper cooling) [2].  
1060 A weakly informative half-Normal(0,1) prior was used for  $\tau$ . We constrained  
1061 all  $p_{ij} < 1$  in the model.

1062 The model was implemented via Markov Chain Monte Carlo (MCMC) methods  
1063 in JAGS. We used 4 MCMC chains with 20,000 iterations each after an initial  
1064 burn-in of 20,000 iterations. Trace plots of all parameters were monitored for  
1065 convergence. We additionally calculated the convergence diagnostic of  
1066 Gelman-Rubin for all parameters. All point estimates reported are posterior  
1067 medians.

1068

1069 **References**

1070 1. Pedroza C, Tyson JE, Das A, Laptook A, Bell EF, Shankaran S, et al. Advantages  
1071 of Bayesian monitoring methods in deciding whether and when to stop a clinical  
1072 trial: an example of a neonatal cooling trial. *Trials*. 2016;17:335.

1073 2. Simon R. Bayesian subset analysis: application to studying treatment-by-  
1074 gender interactions. *Stat. Med.* 2002;21:2909–16.

1075

1076

1077

**Summary of the OPTIMIZING COOLING STRATEGIES AT < 6 HOURS OF AGE FOR NEONATAL HYPOXIC-ISCHEMIC ENCEPHALOPATHY (HIE) Protocol changes**

**Protocol revision September 9, 2010**

**OC TECHNICAL MEMO # 1**

Welcoming Dr. Edward Bell to the Optimizing Cooling subcommittee; page 2-1 in the manual, cover page of the protocol

**Protocol revision December 7, 2011 (draft) and January 9, 2012 (approved for implementation)**

**OC TECHNICAL MEMO # 14**

**Protocol Changes**

Clarified that a *subset of infants will require a cranial sonogram performed within 48-72 hours following the end of the intervention period*, not all. Section 4.11.g

Budget moved to Appendix B and Protocol Versions as Working Draft as Appendix A.

**Protocol revision February 15, 2013**

**OC TECHNICAL MEMO # 21**

A change to one of the Optimizing Cooling Study exclusion criteria has been made. In the initial protocol, infants with a core temperature < 33.5°C for > 1 hour at the time of screening by the research team would not be eligible for the study. The currently revised protocol *amends this exclusion criterion as follows*: infants with a core temperature < 32.5°C for ≥ 2 hours at the time of randomization by the research team would not be eligible for the study.

Enclosed is the rationale for this change; the need to reassess the temperature criteria for exclusion based on recent data from Optimizing Cooling (OC), provided from the study PI, Dr. Seetha Shankaran. *The enclosed letter was reviewed and approved by the Data Safety and Monitoring Committee on February 15, 2013.*

Subject: Optimizing Cooling (OC) Strategies Trial Exclusion criteria

Rationale: Need to reassess the temperature criteria for exclusion based on recent data from OC Trial

The NICHD NRN DSMC has raised concern about overcooled infants being included in the OC Trial, since the practice of cooling on transport has permeated medical practice. Based on advice from the DSMC, the OC trial eligibility criteria were designed to exclude infants who were overcooled. The OC trial criteria include the following: Exclude if the core temperature is < 33.5°C for > one hour at the time of screening for eligibility. Given that clinical cooling is standard practice currently, NRN sites were allowed to initiate clinical cooling once an infant was eligible, pending consent for random assignment. It should be noted that obtaining consent

usually occurs within a short period of time, but for this trial may take longer (several hours) in select cases, due to maternal sedation/anesthesia effects. The OC study research coordinators have confirmed that the exclusion of core temperature of  $< 33.5^{\circ}\text{C}$  for  $> 1$  hour is evaluated **at the initiation of the screening process, but not reexamined at random assignment**. This was highlighted when a recent SAE submitted from an NRN site documented that an infant enrolled as eligible based on current temperature criteria was found after enrollment to have core temperature  $< 33.5^{\circ}\text{C}$  for  $> 1$  hour at random assignment. This incident precipitated a discussion of this entry criterion and realization that the current approach of only checking the temperature at the initiation of screening may not be appropriate for this trial, where the lag between initial screening and randomization may extend to several hours during which hypothermia has been started or ongoing. The subcommittee thus felt the need to revisit this entry criterion, so that we can more reliably respect the intent of the DSMC to exclude overcooled infants from being included in this trial.

We recently reviewed the OC trial enrollment data at the January 2013 Subcommittee meeting. These data showed that:

1) Of 417 infants found to be not eligible, 43 (10%) were excluded because temperature at the time of screening was  $< 33.5^{\circ}\text{C}$  for  $> 1$  hour.

Of 205 infants who were enrolled and had temperature data, 65% were cooled at the time of random assignment; 78 infants were clinically cooled, 31 passively and clinically, 24 passively and 1 with gel packs.

The OC Subcommittee then reviewed data from the first NICHD NRN Hypothermia Trial to look at the early temperature profile of cooled infants. Mean age of randomization for cooled or control groups in the first RCT was 4.3 hours and no infant was cooled prior to screening for eligibility. In the first RCT, once cooling was initiated, within 2 hours, 70% of infants had a temperature  $< 33.5^{\circ}\text{C}$ , 27% had a temperature  $< 33.0^{\circ}\text{C}$ , 12% had a temperature  $< 32.5^{\circ}\text{C}$  and 2% had a temperature  $< 32.0^{\circ}\text{C}$ . Therefore the Subcommittee decided to revisit the exclusion criteria for this trial.

After extensive deliberations, mindful that clinical cooling should not be delayed while consent is being obtained and that some temperature overshoot does occur under controlled clinical cooling, the OC Trial Subcommittee would like to suggest to the NRN DSMC that the exclusion criteria should be changed to “Exclude if core temperature is  $< 32.5^{\circ}\text{C}$  for  $> 2$  hours **at the time of randomization**” Since the duration of cooling is either 72 or 120 hours, there should not be cross contamination between the  $33.5^{\circ}\text{C}$  and  $32.0^{\circ}\text{C}$  groups if the exclusion criterion for temperature at the time of randomization is adjusted to reflect current clinical practice.
